# Supplementary material for: Prevalence of Use of Potentially Inappropriate Medications Among Older Adults Worldwide: A Systematic Review and Meta-Analysis
Source: PubMed Central journal article supplement (PMC10398411; doi:10.1001/jamanetworkopen.2023.26910), 2023-08-02
Supplement: jamanetwopen-e2326910-s001.pdf [file jamanetwopen-e2326910-s001.pdf]

## Supplementary Online Content

Tian F, Chen Z, Zeng Y, Feng Q, Chen X. Prevalence of use of potentially inappropriate medications among older adults worldwide: a systematic review and meta-analysis. *JAMA Netw Open*. 2023;6(8):e2326910.  
doi:10.1001/jamanetworkopen.2023.26910

**eAppendix 1.** A Sample of the Search Strategy

**eAppendix 2.** Characteristics of Included Studies

**eAppendix 3.** Risk of Bias Assessment

**eAppendix 4.** Meta-Analysis of the Prevalence of PIMs in Outpatients Ordered by Countries

**eAppendix 5.** Forest Plot of the Overall Prevalence of PIM in Outpatient Services

**eAppendix 6.** Stratified Meta-Analysis of the Trend of the Prevalence of PIM for Each Group in World Bank Countries

**eAppendix 7.** The List of the Top 10 Most Common Drugs Used With PIM Criteria

**eAppendix 8.** Leave-One-Out Sensitivity Analyses

**eAppendix 9.** Funnel Plot for the Prevalence of PIMs

**eReferences**

This supplementary material has been provided by the authors to give readers additional information about their work.

eAppendix 1. A sample of the search strategy

PubMed

|    |                                                           |
|----|-----------------------------------------------------------|
| 1  | "Ambulatory Care"[MeSH]                                   |
| 2  | "Outpatient Care"[title/abstract]                         |
| 3  | "Outpatient Health Service*"[title/abstract]              |
| 4  | "Outpatient Service*"[title/abstract]                     |
| 5  | "Clinic Visit*"[title/abstract]                           |
| 6  | "Urgent Care*"[title/abstract]                            |
| 7  | "Outpatient*"[title/abstract]                             |
| 8  | 1 or 2 or 3 or 4 or 5 or 6 or 7                           |
| 9  | "Aged"[MeSH]                                              |
| 10 | "elder*"[title/abstract]                                  |
| 11 | "Older"[title/abstract]                                   |
| 12 | "Geriatric"[title/abstract]                               |
| 13 | 9 or 10 or 11 or 12                                       |
| 14 | "Potentially Inappropriate Medication"[MeSH]              |
| 15 | "Inappropriate Prescribing"[MeSH]                         |
| 16 | "Potentially Inappropriate Medication*"[Title/Abstract]   |
| 17 | "Potentially Inappropriate Prescription*"[Title/Abstract] |
| 18 | "Inappropriate Medication"[Title/Abstract]                |
| 19 | "Inappropriate Prescription"[Title/Abstract]              |
| 20 | "Inappropriate Prescribing"[Title/Abstract]               |
| 21 | "Inappropriate Drug Use"[Title/Abstract]                  |
| 22 | "Over Prescribing*"[title/abstract]                       |
| 23 | 14 or 15 or 16 or 17 or 18 or 19 or 20 or 21 or 22        |
| 24 | 8 and 13 and 23                                           |

Embase

|   |                                          |
|---|------------------------------------------|
| 1 | exp outpatient                           |
| 2 | outpatient.ab.ti                         |
| 3 | 1 or 2                                   |
| 4 | exp potentially inappropriate medication |

|    |                                            |
|----|--------------------------------------------|
| 5  | potentially inappropriate medication.ab.ti |
| 6  | 4 or 5                                     |
| 7  | exp aged                                   |
| 8  | older.ab.ti                                |
| 9  | 7 or 8                                     |
| 10 | 3 and 6 and 9                              |

Web of Science

|   |                                         |
|---|-----------------------------------------|
| 1 | TI=outpatient                           |
| 2 | TI=potentially inappropriate medication |
| 3 | TI=older                                |
| 4 | 1 and 2 and 3                           |

eAppendix 2. Characteristic of included studies

| Study                 | Country | Location      | Study design          | Sample period   | Age definition of older | Mean age (y) | Sample size | Mean of drugs | Male (%) | Population                   | PIM criteria applied                                       | Number of patients with 1 + PIM | PIM prevalence                       | Most commonly used PIM                |
|-----------------------|---------|---------------|-----------------------|-----------------|-------------------------|--------------|-------------|---------------|----------|------------------------------|------------------------------------------------------------|---------------------------------|--------------------------------------|---------------------------------------|
| Asia                  |         |               |                       |                 |                         |              |             |               |          |                              |                                                            |                                 |                                      |                                       |
| Chang et al. 2018     | China   | Taiwan        | Cross-sectional study | 2007.8-2007.10  | 65                      | 76.2 ± 6.2   | 193         | 8.9 ± 3.1     | 53.4     | Outpatients                  | PIM-Taiwan criteria 2010, PIM-Taiwan criteria 2018         | 83/131                          | 83/193;<br>131/193                   | Benzodiazepines                       |
| Chen et al. 2021      | China   | Hangzhou      | Cross-sectional study | 2016.1-2016.3   | 65                      | 73.29 ± 6.53 | 13221       | 3.2 ± 2.52    | 51.3     | Outpatients                  | STOPP/START V2                                             | 1040                            | 1040/13221                           | Benzodiazepines                       |
| Huang et al. 2020     | China   | Changsha      | Cross-sectional study | 2018.1-2018.12  | 65                      | 86           | 1874        | 4             | 80       | Outpatients                  | Beers criteria 2019, Chinese criteria 2017                 | 656/949                         | 656/1874;<br>949/1874                | Benzodiazepines                       |
| Lin et al. 2011       | China   | Taiwan        | Cross-sectional study | 2008.8          | 65                      | 74.8 ± 5.3   | 327         | NR            | 49.5     | Outpatients                  | Beers criteria 2003                                        | 90                              | 90/327                               | Orphenadrine                          |
| Lu et al. 2022        | China   | Shenzhen      | Cross-sectional study | 2015-2017       | 65                      | 74.8 ± 5.4   | 74916       | NR            | 55.2     | Diabetes outpatients         | Beers criteria 2019                                        | 27017                           | 27017/74916                          | Diuretics                             |
| Tian et al. 2021      | China   | Chengdu       | Cross-sectional study | 2018.1-2018.12  | 65                      | 74           | 12005       | 3             | 59.61    | Outpatients                  | Beers criteria 2019, Beers criteria 2015                   | 4129/3719                       | 4129/12005;<br>3719/12005            | Benzodiazepines                       |
| Tian et al. 2022a     | China   | Chengdu       | Cross-sectional study | 2018.1-2018.12  | 65                      | 72           | 6160        | 3             | 53.47    | Cancer outpatients           | Chinese criteria 2017, Beers criteria 2019, STOPP/START V2 | 2117/2011/983                   | 2117/6160;<br>2011/6160;<br>983/6160 | Benzodiazepines                       |
| Tian et al. 2022b     | China   | Chengdu       | Cross-sectional study | 2016.1-2021.12  | 65                      | NR           | 7238        | NR            | NR       | Lung cancer outpatients      | Beers criteria 2019                                        | 2225                            | 2225/7238                            | NR                                    |
| Weng et al. 2013      | China   | Taiwan        | Cross-sectional study | 2012.1-2012.6   | 65                      | 75.5 ± 7.1   | 780         | 6.7 ± 4.6     | 43       | Chronic diseases outpatients | STOPP/START V1                                             | 302                             | 302/780                              | NR                                    |
| Zeng et al. 2020      | China   | Beijing       | Cross-sectional study | 2018.9-2019.11  | 65                      | NR           | 1519        | NR            | 47.1     | Outpatients                  | Beers criteria 2015, Beers criteria 2019, STOPP/START V2   | 604/685/911                     | 604/1519;<br>685/1519;<br>911/1519   | Diuretic                              |
| Zhang et al. 2021     | China   | Hongkong      | Cross-sectional study | 2014.1-2014.12  | 65                      | 75.1 ± 7.7   | 489301      | 9.6 ± 7.0     | 45.6     | Outpatients                  | Beers criteria 2015, Hong Kong-specific criteria           | 232445/241982                   | 232445/489301;<br>241982/489301      | Chlorpheniramine                      |
| Zhang et al. 2022     | China   | Chengdu       | Cross-sectional study | 2016.1-2018.12  | 60                      | NR           | 44458       | NR            | 61.54    | Outpatients                  | Chinese criteria 2017, Beers criteria 2015                 | 15728/13358                     | 15728/44458;<br>13358/44458          | Benzodiazepines                       |
| Zhao et al. 2022      | China   | National      | Cross-sectional study | 2020.1-2020.12  | 65                      | 80.88 ± 7.69 | 18624       | 2             | 45.14    | Dementia outpatients         | Beers criteria 2019                                        | 7344                            | 7344/18624                           | Antipsychotic drugs                   |
| Anand et al. 2022     | India   | New Delhi     | Cross-sectional study | 2016.4-2017.11  | 60                      | 65.4 ± 4.7   | 380         | 6.7 ± 2.1     | 56.6     | Outpatients                  | Beers criteria 2015                                        | 249                             | 249/380                              | Proton pump inhibitors                |
| Bahat et al. 2019     | India   | Kerala        | Cross-sectional study | 2016.1-2016.6   | 65                      | 73.6 ± 6.7   | 400         | NR            | 47.7     | Outpatients                  | Beers criteria 2015                                        | 136                             | 136/400                              | Proton-pump inhibitors                |
| Mugada et al. 2021    | India   | Visakhapatnam | Cross-sectional study | 2019.1-2020.1   | 65                      | 65.90 ± 5.48 | 275         | NR            | 53.1     | Outpatients                  | STOPP/START V2                                             | 60                              | 60/275                               | Diclofenac                            |
| Shah et al. 2016      | India   | Ahmedabad     | Cross-sectional study | 2015.2-2015.7   | 65                      | 68.9 ± 7.1   | 236         | 6.11 ± 4.3    | NR       | Cardiac outpatients          | Beers criteria 2012                                        | 69                              | 69/236                               | Spironolactone                        |
| Sharma et al. 2021    | India   | Moga          | Cross-sectional study | 2018            | 65                      | NR           | 456         | 3             | 59.6     | Psychiatric outpatients      | Beers criteria 2019, STOPP/START V2                        | 362/282                         | 362/456;<br>282/456                  | Benzodiazepines                       |
| Zaveri et al. 2010    | India   | Ahmedabad     | Cross-sectional study | 2005.11-2006.2  | 65                      | NR           | 407         | 4.27          | 53.07    | Outpatients                  | Beers criteria 2003                                        | 96                              | 96/407                               | Pheniramine                           |
| Patel et al. 2022     | India   | Gujarat       | Cross-sectional study | 2018.10-2019.11 | 65                      | 69.43 ± 5.47 | 306         | 5.04 ± 2.44   | 60.1     | Outpatients                  | STOPP/START V2                                             | 88                              | 88/306                               | Antihistaminic                        |
| Arai et al. 2019      | Japan   | Chiba         | Cross-sectional study | 2016.10-2016.12 | 65                      | 73           | 13630       | 3             | 50.3     | Outpatients                  | STOPP-J criteria                                           | 5245                            | 5245/13630                           | Non-steroidal anti-inflammatory drugs |
| Bonfiglio et al. 2019 | Japan   | Nagoya        | Cross-sectional study | 2019            | 64                      | 78.3 ± 5.8   | 160         | 5.4 ± 4.1     | 54.4     | Dementia outpatients         | STOPP-J criteria                                           | 54                              | 54/160                               | Antithrombotic drugs                  |
| Fujie et al. 2020     | Japan   | Ibaraki       | Cross-sectional study | 2015.2-2015.3   | 75                      | NR           | 8080        | 4             | 45.4     | Outpatients                  | STOPP-J criteria                                           | 2157                            | 2157/8080                            | Benzodiazepines                       |

|                        |        |                       |                       |                  |    |                                                                                     |                                                       |                                                 |             |                                          |                                                       |                                   |                                   |                                       |
|------------------------|--------|-----------------------|-----------------------|------------------|----|-------------------------------------------------------------------------------------|-------------------------------------------------------|-------------------------------------------------|-------------|------------------------------------------|-------------------------------------------------------|-----------------------------------|-----------------------------------|---------------------------------------|
| Masumoto et al. 2017   | Japan  | Tokyo                 | Cross-sectional study | 2016.1-2016.3    | 65 | 75.7 ± 7.5                                                                          | 740                                                   | 4                                               | 48.8        | Outpatients                              | STOPP/START V2                                        | 239                               | 239/740                           | Benzodiazepines                       |
| Suzuki et al. 2021     | Japan  | National              | Cross-sectional study | 2014.10, 2019.12 | 65 | NR                                                                                  | 180673; 333869                                        | 4.05 ± 3.24; 3.98 ± 3.16                        | 43.9; 43.6  | Outpatients                              | STOPP-J criteria                                      | 48420/145900                      | 48420/180673; 145900/333869       | NR                                    |
| Uragami et al. 2021    | Japan  | Kagawa                | Cross-sectional study | 2020.2-2020.4    | 65 | 70                                                                                  | 923                                                   | 4                                               | 46.8        | Frailty outpatients                      | STOPP-J criteria                                      | 420                               | 420/923                           | Benzodiazepines                       |
| Bahat et al. 2017      | Turkey | Istanbul              | Cross-sectional study | 2000.6-2014.6    | 65 | 77.6 ± 6.3                                                                          | 667                                                   | 6.1 ± 3.4                                       | 36.9        | Outpatients                              | Beers criteria 2012, STOPP/START V2                   | 222/261                           | 222/667; 261/667                  | Aspirin                               |
| Kelleci et al. 2022    | Turkey | Ankara                | Cross-sectional study | 2015.9-2016.5    | 65 | 75.75 ± 6.56                                                                        | 700                                                   | 7.46 ± 2.38                                     | 37.2        | Outpatients                              | STOPP/START V2                                        | 316                               | 316/700                           | Non-steroidal anti-inflammatory drugs |
| Paksoy et al. 2019     | Turkey | Istanbul              | Cross-sectional study | 2014.12-2015.3   | 65 | 71.78 ± 5.50                                                                        | 114                                                   | NR                                              | 55.26       | Oncology outpatients                     | STOPP/START V2                                        | 18                                | 18/114                            | Aspirin                               |
| Pala et al. 2022       | Turkey | Istanbul              | Cross-sectional study | 2018.1-2020.1    | 65 | 73.33 ± 7.30                                                                        | 657                                                   | 5.49 ± 3.93                                     | 38.8        | Outpatients                              | STOPP/START V2                                        | 424                               | 424/657                           | Non-steroidal anti-inflammatory drugs |
| Sahin et al. 2021      | Turkey | Ankara                | Cross-sectional study | 2019.6-2019.12   | 65 | 73.95 ± 7.30                                                                        | 235                                                   | 5.14 ± 1.90                                     | 65.1        | Psychiatry outpatients                   | Beers criteria 2019                                   | 84                                | 84/235                            | Antipsychotics                        |
| Sari et al. 2021       | Turkey | Eskişehir             | Cross-sectional study | 2017.12-2018.1   | 65 | 73.18 ± 5.99                                                                        | 513                                                   | 5.67 ± 2.51                                     | 54.2        | Cardiac outpatients                      | Beers criteria 2019, STOPP/START V2                   | 198/234                           | 198/513; 234/513                  | Aspirin                               |
| Cho et al. 2019        | Korea  | National              | Cross-sectional study | 2017.9-2017.12   | 65 | 74.2 ± 6.26                                                                         | 2143                                                  | 6.48 ± 2.46                                     | 76.2        | Lower urinary tract symptoms outpatients | Beers criteria 2015                                   | 1579                              | 1579/2143                         | NR                                    |
| Kim et al. 2015        | Korea  | National              | Cross-sectional study | 2006.1-2006.6    | 65 | NR                                                                                  | 40995267                                              | 4.2 ± 3.3                                       | 35.5        | Outpatients                              | Beers criteria 2003, Zhan criteria, Canadian criteria | 14976293/7922080/4590023/40995267 | 14976293/7922080/4590023/40995267 | NR                                    |
| Kim et al. 2021        | Korea  | National              | Cross-sectional study | 2016             | 65 | 73.70 ± 6.56                                                                        | 27062307                                              | NR                                              | 40.19       | Cardiovascular outpatients               | STOPP/START V2                                        | 341664                            | 341664/27062307                   | Non-steroidal anti-inflammatory drugs |
| Lim et al. 2016        | Korea  | Seoul                 | Cross-sectional study | 2014.1-2014.12   | 65 | 72.4 ± 6.1                                                                          | 25810                                                 | NR                                              | 44.8        | Outpatients                              | Beers criteria 2012                                   | 7132                              | 7132/25810                        | Benzodiazepines                       |
| Yoon et al. 2022       | Korea  | Seoul                 | Cross-sectional study | 2016.1-2016.12   | 65 | 77                                                                                  | 2100                                                  | 6                                               | 36.9        | Dementia outpatients                     | Beers criteria 2015                                   | 987                               | 987/2100                          | Benzodiazepines                       |
| Al-Omar et al. 2013    | Saudi  | Riyadh                | Cross-sectional study | 2002-2004        | 65 | 74.02 ± 7.46                                                                        | 910644                                                | NR                                              | 58.92       | Outpatients                              | Beers criteria 2003                                   | 20521                             | 20521/910644                      | Digoxin                               |
| Alwhaibi et al. 2022   | Saudi  | Riyadh                | Cross-sectional study | 2019.1-2020.1    | 65 | 72 ± 6.16                                                                           | 1853                                                  | 7                                               | 38.32       | Diabetes and hypertension outpatients    | Beers criteria 2019                                   | 1039                              | 1039/1853                         | Gastrointestinal medications          |
| Alhawassi et al. 2019  | Saudi  | Riyadh                | Cross-sectional study | 2016.1-2016.12   | 65 | 72.6 ± 6.2                                                                          | 4073                                                  | NR                                              | 43.2        | Outpatients                              | Beers criteria 2015                                   | 2309                              | 2309/4073                         | Gastrointestinal medications          |
| Meraya et al. 2020     | Saudi  | Jazan                 | Cross-sectional study | 2018.1-2018.12   | 60 | NR                                                                                  | 1300                                                  | NR                                              | 41.4        | Psychiatric disorders outpatients        | Beers criteria 2015                                   | 892                               | 892/1300                          | Amitriptyline                         |
| Europe                 |        |                       |                       |                  |    |                                                                                     |                                                       |                                                 |             |                                          |                                                       |                                   |                                   |                                       |
| Cojutti et al. 2016    | Italy  | Friuli-Venezia Giulia | Cross-sectional study | 2014.3           | 65 | 76                                                                                  | 527                                                   | 5                                               | 42.7        | Outpatients                              | Beers criteria 2012                                   | 292                               | 292/527                           | Benzodiazepines                       |
| Galimberti et al. 2022 | Italy  | Piedmont              | Cross-sectional study | 2012-2018        | 65 | 75.69 ± 7.17; 75.77 ± 7.25; 75.83 ± 7.29; 75.89 ± 7.29; 75.98 ± 7.32; 76.05 ± 7.32; | 967268/984352/1001662/1007880/1016257/1019764/1022156 | 38.61, 38.94, 38.77, 38.84, 38.85, 38.98, 39.03 | Outpatients | ERD list                                 | 418537/429670/4083768; 8/389848/375812/363138/339764  | 418537/967268; 429670/984352;     | 418537/967268; 429670/984352;     | Diclofenac                            |

|                              |             |                                  |                                     |                              |    |                                                            |                                         |           |                              |                                      |                                      |                                         |                                                                                                 |                                       |
|------------------------------|-------------|----------------------------------|-------------------------------------|------------------------------|----|------------------------------------------------------------|-----------------------------------------|-----------|------------------------------|--------------------------------------|--------------------------------------|-----------------------------------------|-------------------------------------------------------------------------------------------------|---------------------------------------|
|                              |             |                                  |                                     |                              |    | 76.14 ± 7.34                                               | 4                                       |           |                              |                                      |                                      |                                         | 408378/1001662;<br>389848/1007880;<br>375812/1016257;<br>363138/1019764;<br>3397641022154       |                                       |
| Loddo et al. 2022            | Italy       | Monserrato                       | Cross-sectional study               | 2018.1-2018.12               | 65 | 80                                                         | 3091                                    | 7         | 28.3                         | Outpatients                          | Beers criteria 2019, STOPP/START V2  | 2287/2358                               | 2287/3091;<br>2358/3091                                                                         | NR                                    |
| Maio et al. 2006             | Italy       | Emilia Romagna                   | Cohort study                        | 2001.1-2001.12               | 65 | 75.6 ± 7.5                                                 | 849425                                  | NR        | 41.1                         | Outpatients                          | Beers criteria 2003                  | 152641                                  | 152641/849425                                                                                   | Doxazosin                             |
| Maio et al. 2010             | Italy       | Parma                            | Cohort study                        | 2006.1-2006.12               | 65 | 75.7 ± 7.7                                                 | 91741                                   | NR        | 40.9                         | Outpatients                          | Beers criteria 2003                  | 23662                                   | 23662/91741                                                                                     | Non-steroidal anti-inflammatory drugs |
| Varga et al. 2017            | Italy       | Emilia Romagna                   | Cohort study                        | 2003.1-2013.12               | 65 | NR                                                         | 1480137                                 | NR        | NR                           | Outpatients                          | Maio criteria                        | 802815                                  | 802815/1480137                                                                                  | Non-steroidal anti-inflammatory drugs |
| Bongue et al. 2009           | France      | Nancy-Vandoeuvre, Verdun, Longwy | Cross-sectional study               | 1995-2004                    | 65 | 70.1 ± 4.3                                                 | 30683                                   | 3.3 ± 2.6 | 48.8                         | Outpatients                          | Beers criteria 1997, French criteria | 3097/7802                               | 3097/30683;<br>7802/30683                                                                       | Propoxyphene                          |
| Choukroun et al. 2020        | France      | Nimes                            | Cross-sectional study               | 2016.5-2017.3                | 75 | 83                                                         | 51                                      | NR        | 43                           | Cancer outpatients                   | French criteria, STOPP/START V2      | 16/29                                   | 16/83;<br>29/83                                                                                 | NR                                    |
| Drusch et al. 2021           | France      | National                         | Cross-sectional study               | 2011, 2013, 2015, 2017, 2019 | 75 | 82.1 ± 5.4; 82.4 ± 5.5; 82.6 ± 5.6; 82.8 ± 5.7; 82.8 ± 5.8 | 5777645/6068742/6151861/6206973/6328155 | NR        | 37.8, 38.5, 38.9, 39.5, 40.1 | Outpatients                          | Beers criteria 2015, STOPP/START V2  | 2884533/2872892/2776084/2639705/2506266 | 2884533/5777645;<br>2872892/6068742;<br>2776084/6151861;<br>2639705/6206973;<br>2506266/6328155 | Benzodiazepines                       |
| Dubois-Puechlong et al. 2019 | France      | Multicenter                      | Cross-sectional study               | 2016.3-2016.5                | 75 | 83 ± 5.5                                                   | 1178                                    | 7         | 41                           | Antithrombotic therapies outpatients | STOPP/START V2                       | 235                                     | 235/1178                                                                                        | NR                                    |
| Dormann et al. 2013          | Germany     | Bavaria                          | Cross-sectional study               | 2010.9                       | 65 | 78 ± 7                                                     | 351                                     | NR        | 43.9                         | Outpatients                          | PRISCUS list                         | 51                                      | 51/351                                                                                          | NR                                    |
| Endres et al. 2016           | Germany     | NR                               | Cross-sectional study               | 2019.1-2020.12               | 65 | 73                                                         | 392337                                  | 4.3 ± 3.5 | 39.3                         | Outpatients                          | PRISCUS list                         | 79041                                   | 79041/392337                                                                                    | Benzodiazepines                       |
| Fiss et al. 2011             | Germany     | Mecklenburg                      | Cross-sectional study               | 2006.3-2008.12               | 65 | 80.5 ± 6.7                                                 | 744                                     | 8.2 ± 4   | 26.9                         | Outpatients                          | Beers criteria 2003                  | 134                                     | 134/744                                                                                         | Benzodiazepines                       |
| Gudd et al. 2020             | Germany     | Bavaria                          | Cross-sectional study               | 2010-2014                    | 65 | NR                                                         | 410934                                  | NR        | NR                           | Outpatients                          | PRISCUS list                         | 23021                                   | 23021/410934                                                                                    | Hypnotic                              |
| Ham et al. 2022              | Netherlands | National                         | Cohort study                        | 2009-2014                    | 65 | 74                                                         | 7864                                    | 6         | 67                           | Lung cancer outpatients              | OncPal                               | 3538                                    | 3538/7864                                                                                       | Peptic ulcer prophylaxis              |
| Boersma et al. 2019          | Netherlands | Utrecht                          | Cluster-randomized controlled trial | 2014.10-2016.7               | 70 | 77.8 ± 5.7/79.0 ± 6.0                                      | 124                                     | 9         | 51.6                         | Preoperative outpatients             | STOPP/START V2                       | 118                                     | 118/124                                                                                         | Proton-pump inhibitors                |
| Oktora et al. 2021           | Netherlands | Groningen                        | Cross-sectional study               | 2012-2016                    | 65 | NR                                                         | 16458/17077/17439/17670/15267           | NR        | NR                           | Diabetes outpatients                 | Beers criteria 2015                  | 3004/3057/3098/3053/2518                | 3004/16458;<br>3057/17077;<br>3098/17439;<br>3053/17670;                                        | Proton-pump inhibitors                |

|                          |             |                   |                       |                 |    |              |           |             |      |                                       |                                          |             |                          |                                       |
|--------------------------|-------------|-------------------|-----------------------|-----------------|----|--------------|-----------|-------------|------|---------------------------------------|------------------------------------------|-------------|--------------------------|---------------------------------------|
|                          |             |                   |                       |                 |    |              |           |             |      |                                       |                                          |             | 2518/15267               |                                       |
| van et al. 2021          | Netherlands | Deventer          | Cross-sectional study | 2018.5-2019.1   | 65 | 72 ± 8       | 150       | 11          | 59   | Cancer outpatients                    | STOPP/START V2                           | 97          | 97/150                   | Benzodiazepines                       |
| Santos-Pérez et al. 2021 | Spain       | Soria, Valladolid | Cross-sectional study | 2016.3          | 65 | 78.0 ± 7.2   | 225       | NR          | 48   | Psychotropic outpatients              | Beers criteria 2015                      | 51          | 51/225                   | Benzodiazepines                       |
| Yeste-Gómez et al. 2014  | Spain       | Madrid            | Cross-sectional study | 2012.10-2012.12 | 65 | 80.2         | 131       | NR          | 58.8 | Outpatients                           | STOPP/START V1                           | 73          | 73/131                   | Benzodiazepines                       |
| Cvetković et al. 2019    | Serbia      | Belgrade          | Cross-sectional study | 2019            | 65 | 74.23 ± 6.92 | 248       | 5.25 ± 2.70 | 62.1 | Outpatients                           | STOPP/START V2                           | 53          | 53/248                   | Proton-pump inhibitors                |
| Projovic et al. 2016     | Serbia      | Kragujevac        | Case-control study    | 2013.9-2014.9   | 65 | NR           | 324       | NR          | 38.9 | Outpatients                           | STOPP/START V2                           | 122         | 122/324                  | Benzodiazepines                       |
| North America            |             |                   |                       |                 |    |              |           |             |      |                                       |                                          |             |                          |                                       |
| Buck et al. 2009         | USA         | Utah, Cleveland   | Cross-sectional study | 2006            | 65 | NR           | 61251     | NR          | 40.1 | Outpatients                           | Beers criteria 2003; Zhan Criteria       | 14221/10196 | 14221/61251; 10196/61251 | Fluoxetine                            |
| Curtis et al. 2004       | USA         | National          | Cohort study          | 1999            | 65 | 73.7 ± 6.5   | 765423    | NR          | 41.7 | Outpatients                           | Beers criteria 1997                      | 162370      | 162370/765423            | Amitriptyline                         |
| Dunn et al. 2011         | USA         | Oklahoma          | Cross-sectional study | 2008.11-2009.3  | 65 | 74           | 120       | NR          | NR   | Outpatients                           | Beers criteria 2003                      | 45          | 45/120                   | Estrogen formulations                 |
| Gardner et al. 2020      | USA         | Colorado          | Cross-sectional study | 2017.3-2017.8   | 65 | NR           | 192       | NR          | 40.6 | Outpatients                           | Beers criteria 2019                      | 58          | 58/192                   | NR                                    |
| Hustey et al. 2007       | USA         | Cleveland         | Cross-sectional study | 2004.6          | 65 | 75.13 ± 7.05 | 352       | 8.5         | 45   | Outpatients                           | Beers criteria 2003                      | 111         | 111/352                  | Propoxyphene/acetaminophen            |
| Lund et al. 2011         | USA         | Iowa              | Cross-sectional study | 2001-2003       | 65 | 74.6 ± 5.4   | 240       | 10.5 ± 4.0  | 98.3 | Outpatients                           | Beers criteria 2003                      | 106         | 106/240                  | NR                                    |
| Maggiore et al. 2014     | USA         | Multicenter       | Cohort study          | 2006.11-2009.11 | 65 | 73           | 500       | 5 ± 4       | 44   | Cancer outpatients                    | Beers criteria 2012; Zhan Criteria       | 147/54      | 147/500; 54/500          | Zolpidem                              |
| Maio et al. 2006         | USA         | Pennsylvania      | Cross-sectional study | 2004.1-2004.6   | 65 | 75.0 ± 6.7   | 100       | NR          | 18   | Outpatients                           | Beers criteria 2003                      | 24          | 24/100                   | Non-steroidal anti-inflammatory drugs |
| Nightingale et al. 2022  | USA         | Pennsylvania      | Cross-sectional study | 2017.11-2020.2  | 60 | 67.9 ± 6.4   | 168       | NR          | 24.4 | Diabetes outpatients                  | Beers criteria 2019                      | 67          | 67/168                   | Non-steroidal anti-inflammatory drugs |
| Pugh et al. 2005         | USA         | National          | Cross-sectional study | 1999.10-2000.10 | 65 | 73.5 ± 5.6   | 1265434   | NR          | 98   | Outpatients                           | Zhan Criteria                            | 249566      | 249566/1265434           | Chlordiazepoxide                      |
| Pyszka et al. 2010       | USA         | Wisconsin         | Cross-sectional study | 2008.4-2008.9   | 70 | 78.4 ± 5.4   | 111       | NR          | 99.1 | Outpatients                           | STOPP/START V1                           | 65          | 65/111                   | Aspirin                               |
| Skaar et al. 2017        | USA         | National          | Cross-sectional study | 2012            | 65 | NR           | 17663006  | NR          | NR   | Dental outpatients                    | Beers criteria 2015                      | 10445148    | 10445148/17663006        | Omeprazole                            |
| Viswanathan et al. 2005  | USA         | National          | Cross-sectional study | 2001            | 65 | NR           | 157680651 | NR          | 40.8 | Outpatients                           | Beers criteria 2012                      | 21168138    | 21168138/157680651       | Propoxyphene                          |
| Weston et al. 2010       | USA         | California        | Cross-sectional study | 2008.7-2009.1   | NR | 75.3 ± 9.8   | 689       | NR          | 50.5 | Mild cognitive impairment outpatients | Beers criteria 2003                      | 143         | 143/689                  | Anticholinergics                      |
| South America            |             |                   |                       |                 |    |              |           |             |      |                                       |                                          |             |                          |                                       |
| Baldoni et al. 2014      | Brazil      | Sao Paulo         | Cross-sectional study | 2008.11-2009.5  | 60 | 69.8 ± 6.5   | 1000      | 6.9         | 33.9 | Outpatients                           | Beers criteria 2003; Beers criteria 2012 | 480/592     | 480/1000; 592/1000       | Diclofenac                            |
| da Costa et al. 2019     | Brazil      | Fortaleza         | Cross-sectional study | 2017.4-2017.9   | 60 | 66.5 ± 5.3   | 143       | NR          | 65.7 | Kidney transplant outpatients         | Beers criteria 2015                      | 111         | 111/143                  | Omeprazole                            |
| Faustino et al. 2013     | Brazil      | Sao Paulo         | Cross-sectional study | 2008.2-2008.5   | 60 | 80.1         | 1270      | NR          | 23   | Outpatients                           | Beers criteria 2003                      | 342         | 342/1270                 | Muscle relaxant                       |
| Fulone et al. 2017       | Brazil      | Sao Paulo         | Cross-sectional study | 2008.1-2009.12  | 60 | NR           | 174       | NR          | 18.9 | Taking antidepressant outpatients     | Beers criteria 2015; STOPP/START V1      | 52/69       | 52/174; 69/174           | Benzodiazepines                       |
| Marques et al.           | Brazil      | Mato              | Cross-sectional study | 2016.3-2017.9   | 60 | 69.5 ± 6.79  | 44        | NR          | 36.4 | Outpatients                           | Beers criteria 2015                      | 10          | 10/44                    | Insulin                               |

|                            |           |               |                       |                 |    |              |     |             |      |                              |                                     |        |                 |                                       |
|----------------------------|-----------|---------------|-----------------------|-----------------|----|--------------|-----|-------------|------|------------------------------|-------------------------------------|--------|-----------------|---------------------------------------|
| 2018                       |           | Grosso do Sul | study                 |                 |    |              |     |             |      |                              |                                     |        |                 |                                       |
| Oliveira et al. 2020       | Brazil    | Sao Paulo     | Cross-sectional study | 2020            | 60 | 74.9 ± 9.4   | 233 | 6.6 ± 3.1   | NR   | Outpatients                  | PIM-CCVAEs list                     | 173    | 173/233         | NR                                    |
| Reis et al. 2017           | Brazil    | Minas Gerais  | Cross-sectional study | 2015.5-2015.12  | 60 | NR           | 160 | 3           | 42.5 | Cancer outpatients           | Beers criteria 2015                 | 78     | 78/160          | Proton-pump inhibitors                |
| Viana et al. 2022          | Brazil    | Sao Paulo     | Cohort study          | 2014-2017       | 60 | 79.2±8.2     | 868 | 8.5         | 38.8 | Acute conditions outpatients | Beers criteria 2019                 | 352    | 352/868         | Proton-pump inhibitors                |
| Africa                     |           |               |                       |                 |    |              |     |             |      |                              |                                     |        |                 |                                       |
| abubakar et al. 2021       | Nigeria   | Niger         | Cross-sectional study | 2016.6-2016.9   | 65 | 71.1 ± 6.1   | 244 | 5.4 ± 2.3   | 49.2 | Outpatients                  | Beers criteria 2015; STOPP/START V2 | 164/98 | 164/244; 98/244 | Non-steroidal anti-inflammatory drugs |
| Akande-Sholabi et al. 2018 | Nigeria   | Ibadan        | Cross-sectional study | 2016.6-2016.9   | 60 | 70.2 ± 5.9   | 400 | NR          | 40   | Outpatients                  | Beers criteria 2015                 | 124    | 124/400         | Non-steroidal anti-inflammatory drugs |
| Fadare et al. 2013         | Nigeria   | Ido-Ekiti     | Cross-sectional study | 2011.4-2011.6   | 65 | 72.8 ± 7.2   | 220 | 3.8 ± 1.3   | 41.8 | Outpatients                  | Beers criteria 2012                 | 56     | 56/220          | Non-steroidal anti-inflammatory drugs |
| Saka et al. 2019           | Nigeria   | NR            | Cross-sectional study | 2016.1-2016.12  | 60 | 69.03 ± 7.35 | 352 | 4.60 ± 1.65 | 42.3 | Outpatients                  | Beers criteria 2015                 | 124    | 124/352         | Antidepressants                       |
| Bhagavathula et al. 2021   | Ethiopia  | NR            | Cross-sectional study | 2020.3-2020.8   | 65 | 71.9 ± 6.07  | 320 | 3.4 ± 1.69  | 59   | Outpatients                  | Beers criteria 2019                 | 151    | 151/320         | Antidiabetic medications              |
| Lemma et al. 2020          | Ethiopia  | Addis Ababa   | Cross-sectional study | 2019.7-2019.8   | 60 | NR           | 400 | 2.51        | 55   | Outpatients                  | Beers criteria 2019                 | 188    | 188/400         | Analgesics                            |
| Tesfaye et al. 2020        | Ethiopia  | Jimma         | Cross-sectional study | 2020.11-2020.12 | 65 | 70           | 219 | 4           | 65.3 | Outpatients                  | Beers criteria 2019 STOPP/START V2  | 182/99 | 182/219; 99/219 | Aspirin/Amitriptyline                 |
| Oceania                    |           |               |                       |                 |    |              |     |             |      |                              |                                     |        |                 |                                       |
| Cross et al. 2016          | Australia | Multicenter   | Cross-sectional study | 2005.4-2007.8   | NR | 77.6 ± 7.4   | 964 | NR          | 52.7 | Memory outpatients           | PIMcog                              | 206    | 206/964         | Anticholinergics                      |
| Saarelainen et al. 2014    | Australia | Adelaide      | Cross-sectional study | 2009.1-2010.7   | 70 | 76.7 ± 4.8   | 385 | NR          | 59   | Cancer outpatients           | Beers criteria 2012                 | 102    | 102/385         | Benzodiazepines                       |

Note: NR: not reported



eAppendix 3. Risk of bias assessment

| Study                 | 1. Target population a close representation of the national population? | 2. Sampling frame representative? | 3. Random selection used? | 4. Data collected directly from subjects? | 5. Acceptable case definition used? | 6. Same mode of data collection for all? | 7. Were the numerator(s) and denominator(s) for the parameter of interest appropriate? |
|-----------------------|-------------------------------------------------------------------------|-----------------------------------|---------------------------|-------------------------------------------|-------------------------------------|------------------------------------------|----------------------------------------------------------------------------------------|
| Chang et al. 2018     | N                                                                       | Y                                 | NA                        | Y                                         | Y                                   | Y                                        | Y                                                                                      |
| Chen et al. 2021      | N                                                                       | N                                 | NA                        | Y                                         | Y                                   | Y                                        | Y                                                                                      |
| Huang et al. 2020     | N                                                                       | Y                                 | NA                        | Y                                         | Y                                   | Y                                        | Y                                                                                      |
| Lin et al. 2011       | N                                                                       | Y                                 | NA                        | Y                                         | Y                                   | Y                                        | Y                                                                                      |
| Lu et al. 2022        | N                                                                       | N                                 | NA                        | Y                                         | Y                                   | Y                                        | Y                                                                                      |
| Tian et al. 2021      | N                                                                       | Y                                 | Y                         | Y                                         | Y                                   | Y                                        | Y                                                                                      |
| Tian et al. 2022a     | N                                                                       | N                                 | Y                         | Y                                         | Y                                   | Y                                        | Y                                                                                      |
| Tian et al. 2022b     | N                                                                       | N                                 | Y                         | Y                                         | Y                                   | Y                                        | N                                                                                      |
| Weng et al. 2013      | N                                                                       | N                                 | NA                        | Y                                         | Y                                   | Y                                        | Y                                                                                      |
| Zeng et al. 2020      | N                                                                       | Y                                 | NA                        | Y                                         | Y                                   | Y                                        | Y                                                                                      |
| Zhang et al. 2021     | Y                                                                       | Y                                 | NA                        | Y                                         | Y                                   | Y                                        | Y                                                                                      |
| Zhang et al. 2022     | N                                                                       | Y                                 | Y                         | Y                                         | Y                                   | Y                                        | Y                                                                                      |
| Zhao et al. 2022      | Y                                                                       | N                                 | Y                         | Y                                         | Y                                   | Y                                        | N                                                                                      |
| Anand et al. 2022     | N                                                                       | Y                                 | NA                        | Y                                         | Y                                   | Y                                        | Y                                                                                      |
| Bahat et al. 2019     | N                                                                       | Y                                 | Y                         | Y                                         | Y                                   | Y                                        | Y                                                                                      |
| Mugada et al. 2021    | N                                                                       | Y                                 | Y                         | Y                                         | Y                                   | Y                                        | Y                                                                                      |
| Shah et al. 2016      | N                                                                       | N                                 | NA                        | Y                                         | Y                                   | Y                                        | Y                                                                                      |
| Sharma et al. 2021    | N                                                                       | N                                 | NA                        | Y                                         | Y                                   | Y                                        | N                                                                                      |
| Zaveri et al. 2010    | N                                                                       | Y                                 | NA                        | Y                                         | Y                                   | Y                                        | Y                                                                                      |
| Patel et al. 2022     | N                                                                       | Y                                 | NA                        | Y                                         | Y                                   | Y                                        | Y                                                                                      |
| Arai et al. 2019      | N                                                                       | Y                                 | NA                        | Y                                         | Y                                   | Y                                        | N                                                                                      |
| Bonfiglio et al. 2019 | N                                                                       | N                                 | NA                        | Y                                         | Y                                   | Y                                        | Y                                                                                      |
| Fujie et al. 2020     | N                                                                       | Y                                 | NA                        | Y                                         | Y                                   | Y                                        | Y                                                                                      |
| Masumoto et al. 2017  | N                                                                       | Y                                 | NA                        | Y                                         | Y                                   | Y                                        | Y                                                                                      |
| Suzuki et al. 2021    | Y                                                                       | Y                                 | NA                        | Y                                         | Y                                   | Y                                        | Y                                                                                      |
| Uragami et al. 2021   | N                                                                       | N                                 | Y                         | Y                                         | Y                                   | Y                                        | Y                                                                                      |
| Bahat et al. 2017     | N                                                                       | Y                                 | Y                         | Y                                         | Y                                   | Y                                        | Y                                                                                      |
| Kelleciet al. 2022    | N                                                                       | Y                                 | NA                        | Y                                         | Y                                   | Y                                        | Y                                                                                      |
| Paksoy et al. 2019    | N                                                                       | N                                 | NA                        | Y                                         | Y                                   | Y                                        | Y                                                                                      |
| Pala et al. 2022      | N                                                                       | Y                                 | NA                        | Y                                         | Y                                   | Y                                        | Y                                                                                      |
| Sahin et al. 2021     | N                                                                       | N                                 | NA                        | Y                                         | Y                                   | Y                                        | Y                                                                                      |
| Sari et al. 2021      | N                                                                       | N                                 | NA                        | Y                                         | Y                                   | Y                                        | Y                                                                                      |
| Cho et al. 2019       | Y                                                                       | N                                 | NA                        | Y                                         | Y                                   | Y                                        | Y                                                                                      |
| Kim et al. 2015       | Y                                                                       | Y                                 | NA                        | Y                                         | Y                                   | Y                                        | Y                                                                                      |
| Kim et al. 2021       | Y                                                                       | N                                 | Y                         | Y                                         | Y                                   | Y                                        | Y                                                                                      |
| Lim et al. 2016       | N                                                                       | N                                 | NA                        | Y                                         | Y                                   | Y                                        | Y                                                                                      |
| Yoon et al. 2022      | N                                                                       | N                                 | NA                        | Y                                         | Y                                   | Y                                        | Y                                                                                      |
| Al-Omar et al. 2013   | Y                                                                       | Y                                 | NA                        | Y                                         | Y                                   | Y                                        | Y                                                                                      |

|                              |   |   |    |   |   |   |   |
|------------------------------|---|---|----|---|---|---|---|
| Alwhaibi et al. 2022         | N | N | NA | Y | Y | Y | Y |
| Alhawassi et al. 2019        | N | Y | NA | Y | Y | Y | Y |
| Meraya et al. 2020           | N | N | NA | Y | Y | Y | Y |
| Cojutti et al. 2016          | Y | Y | NA | Y | Y | Y | Y |
| Galimberti et al. 2022       | N | Y | NA | Y | Y | Y | Y |
| Loddo et al. 2022            | N | Y | NA | Y | Y | Y | N |
| Maio et al. 2006             | Y | Y | NA | Y | Y | Y | Y |
| Maio et al. 2010             | N | Y | NA | Y | Y | Y | Y |
| Varga et al. 2017            | N | Y | NA | Y | Y | Y | Y |
| Bongue et al. 2009           | Y | Y | NA | Y | Y | Y | Y |
| Choukroun et al. 2020        | N | N | NA | Y | Y | Y | Y |
| Drusch et al. 2021           | Y | Y | NA | Y | Y | Y | Y |
| Dubois-Puechlong et al. 2019 | Y | N | NA | Y | Y | Y | Y |
| Dormann et al. 2013          | N | N | NA | Y | Y | Y | Y |
| Endres et al. 2016           | N | Y | NA | Y | Y | Y | Y |
| Fiss et al. 2011             | N | Y | NA | Y | Y | Y | Y |
| Gudd et al. 2020             | N | Y | NA | Y | Y | Y | Y |
| Ham et al. 2022              | Y | N | NA | Y | Y | Y | N |
| Boersma et al. 2019          | N | N | Y  | Y | Y | Y | Y |
| Oktora et al. 2021           | N | N | NA | Y | Y | Y | Y |
| van et al. 2021              | N | N | NA | Y | Y | Y | Y |
| Santos-Pérez et al. 2021     | N | N | Y  | Y | Y | Y | Y |
| Yeste-Gómez et al. 2014      | N | Y | NA | Y | Y | Y | Y |
| Cvetković et al. 2019        | N | Y | NA | Y | Y | Y | Y |
| Projovic et al. 2016         | N | Y | NA | Y | Y | Y | Y |
| Buck et al. 2009             | N | Y | NA | Y | Y | Y | Y |
| Curtis et al. 2004           | Y | Y | NA | Y | Y | Y | Y |
| Dunn et al. 2011             | N | Y | NA | Y | Y | Y | Y |
| Gardner et al. 2020          | N | Y | Y  | Y | Y | Y | Y |
| Hustey et al. 2007           | N | Y | NA | Y | Y | Y | Y |
| Lund et al. 2011             | N | Y | Y  | Y | Y | Y | N |
| Maggiore et al. 2014         | N | N | Y  | Y | Y | Y | Y |
| Maio et al. 2006             | N | Y | Y  | Y | Y | Y | Y |
| Nightingale et al. 2022      | N | N | NA | Y | Y | Y | Y |
| Pugh et al. 2005             | Y | Y | NA | Y | Y | Y | Y |
| Pyszka et al. 2010           | N | Y | NA | Y | Y | Y | Y |
| Skaar et al. 2017            | Y | N | NA | Y | Y | Y | N |
| Viswanathan al. 2005         | Y | Y | NA | Y | Y | Y | Y |
| Weston et al. 2010           | N | N | NA | Y | Y | Y | Y |
| Baldoni et al. 2014          | N | Y | NA | Y | Y | Y | Y |
| da Costa et al. 2019         | N | N | NA | Y | Y | Y | Y |
| Faustino et al. 2013         | N | Y | NA | Y | Y | Y | Y |
| Fulone et al. 2017           | N | N | NA | Y | Y | Y | Y |
| Marques et al. 2018          | N | Y | NA | Y | Y | Y | Y |

|                            |   |   |    |   |   |   |   |
|----------------------------|---|---|----|---|---|---|---|
| Oliveira et al. 2020       | N | Y | NA | Y | Y | Y | Y |
| Reis et al. 2017           | N | N | NA | Y | Y | Y | Y |
| Viana et al. 2022          | N | N | NA | Y | Y | Y | Y |
| abubakar et al. 2021       | N | Y | NA | Y | Y | Y | Y |
| Akande-Sholabi et al. 2018 | N | Y | NA | Y | Y | Y | Y |
| Fadare et al. 2013         | N | Y | NA | Y | Y | Y | Y |
| Saka et al. 2019           | N | Y | Y  | Y | Y | Y | Y |
| Bhagavathula et al. 2021   | N | Y | Y  | Y | Y | Y | Y |
| Lemma et al. 2020          | N | Y | NA | Y | Y | Y | Y |
| Tesfaye et al. 2020        | N | Y | Y  | Y | Y | Y | Y |
| Cross et al. 2016          | N | N | Y  | Y | Y | Y | Y |
| Saarelainen et al. 2014    | N | N | NA | Y | Y | Y | Y |

eAppendix 4. Meta-analysis of the prevalence of PIMs in outpatients ordered by countries

| Country       | Number of studies (number of data points) | Pooled prevalence of PIMs | 95% CI      | I <sup>2</sup> (%) | <i>P</i> |
|---------------|-------------------------------------------|---------------------------|-------------|--------------------|----------|
| Asia          |                                           |                           |             |                    |          |
| China         | 13 (22)                                   | 0.372                     | 0.315-0.431 | 99.93              | <.001    |
| India         | 7 (8)                                     | 0.428                     | 0.274-0.589 | 98.82              | <.01     |
| Japan         | 6 (7)                                     | 0.352                     | 0.295-0.410 | 99.96              | <.001    |
| Turkey        | 6 (8)                                     | 0.396                     | 0.302-0.494 | 96.67              | <.01     |
| Korea         | 5 (7)                                     | 0.279                     | 0.109-0.491 | 100                | <.001    |
| Saudi         | 4 (4)                                     | 0.236                     | 0.188-0.288 | 74.86              | <.001    |
| Europe        |                                           |                           |             |                    |          |
| Italy         | 6 (13)                                    | 0.441                     | 0.347-0.538 | 100                | <.001    |
| France        | 4 (10)                                    | 0.327                     | 0.239-0.421 | 100                | <.001    |
| Germany       | 4 (4)                                     | 0.14                      | 0.077-0.217 | 99.99              | <.001    |
| Netherlands   | 4 (8)                                     | 0.362                     | 0.159-0.594 | 99.78              | <.001    |
| Spain         | 2 (2)                                     | 0.384                     | 0.104-0.715 | 97.49              | <.01     |
| Serbia        | 2 (2)                                     | 0.292                     | 0.148-0.462 | 94.51              | <.01     |
| North America |                                           |                           |             |                    |          |
| USA           | 14 (16)                                   | 0.29                      | 0.221-0.363 | 100                | <.001    |
| South America |                                           |                           |             |                    |          |
| Brazil        | 8 (10)                                    | 0.469                     | 0.351-0.589 | 98.03              | <.01     |
| Africa        |                                           |                           |             |                    |          |
| Nigeria       | 4 (5)                                     | 0.396                     | 0.259-0.541 | 96.44              | <.01     |
| Ethiopia      | 3 (4)                                     | 0.563                     | 0.371-0.746 | 97.3               | <.01     |
| Oceania       |                                           |                           |             |                    |          |
| Australia     | 2 (2)                                     | 0.236                     | 0.188-0.288 | 74.86              | .05      |

## eAppendix 5. Forest plot of the overall prevalence of PIM in outpatient services

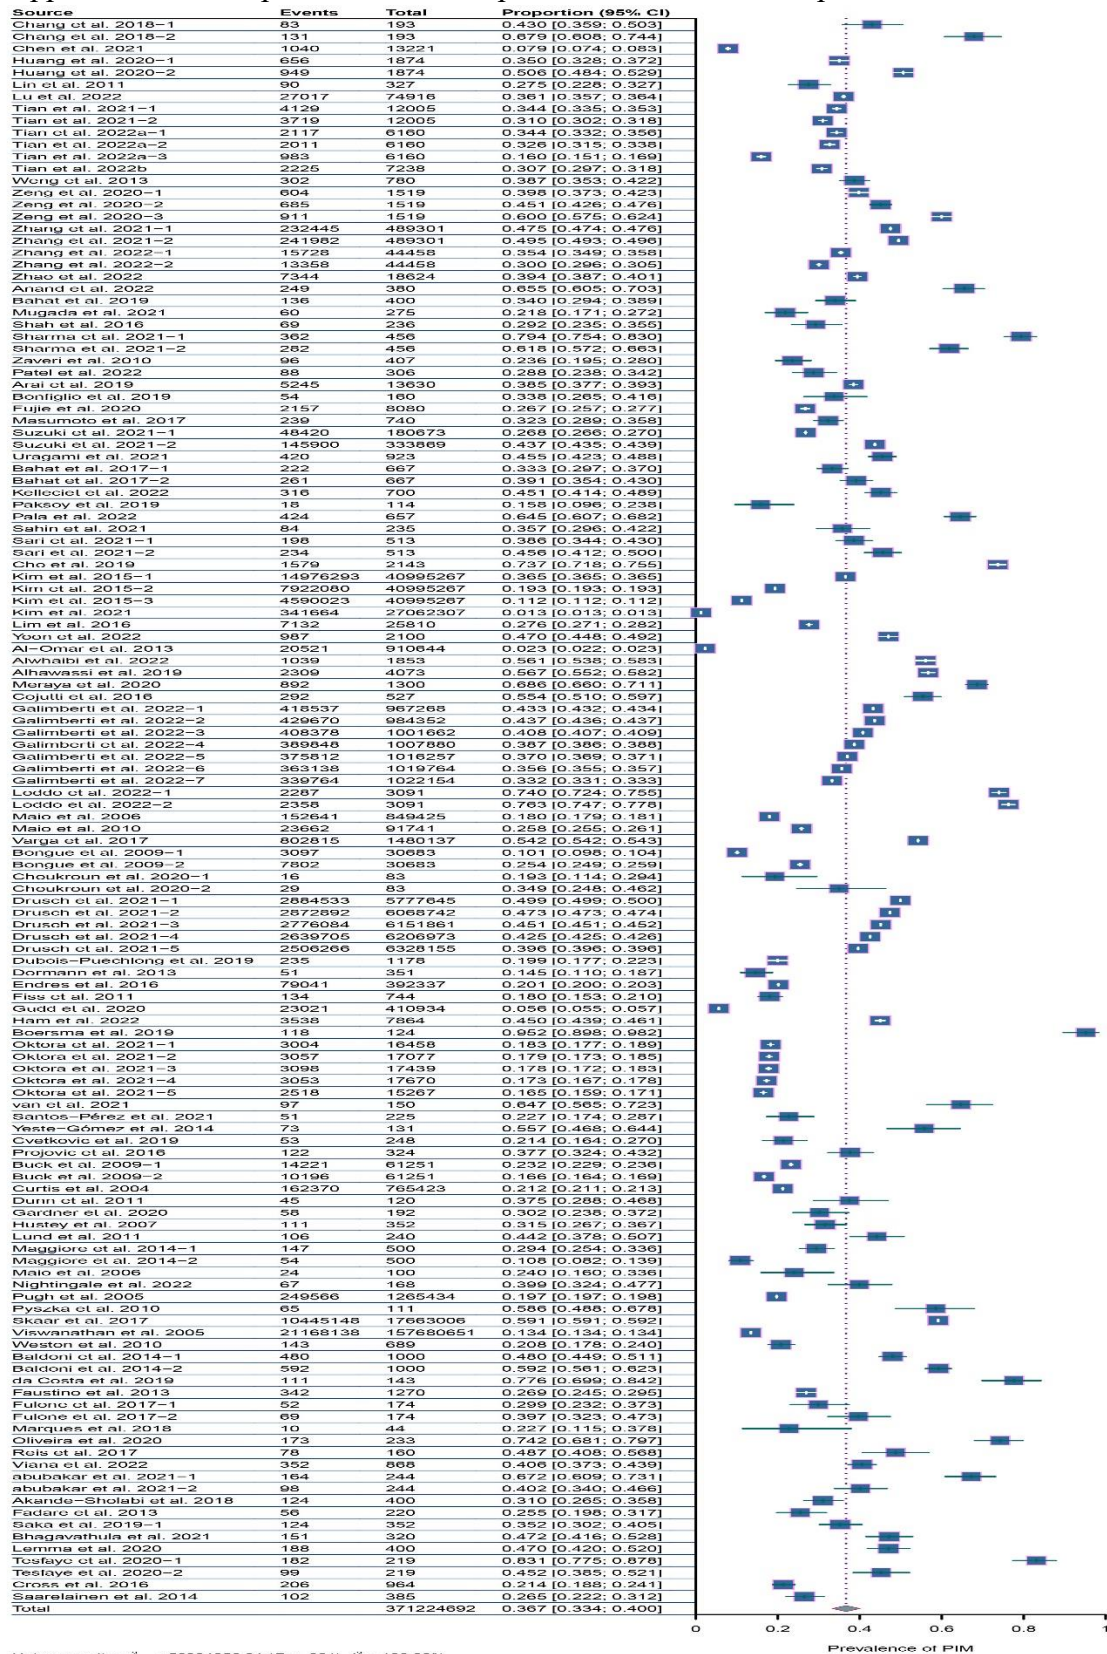

eAppendix 6. Stratified meta-analysis of the trend of the prevalence of PIM for each group in world bank countries

| Characteristics | Pooled prevalence of PIMs | 95% CI      | I <sup>2</sup> (%) | P     |
|-----------------|---------------------------|-------------|--------------------|-------|
| High            |                           |             |                    |       |
| ≤2000           | 0.187                     | 0.125-0.259 | 99.92              | <.001 |
| 2001-2005       | 0.242                     | 0.141-0.361 | 100                | <.001 |
| 2006-2010       | 0.235                     | 0.168-0.309 | 100                | <.001 |
| 2011-2015       | 0.401                     | 0.304-0.502 | 100                | <.001 |
| 2016-2020       | 0.399                     | 0.321-0.481 | 100                | <.001 |
| Upper-middle    |                           |             |                    |       |
| 2006-2010       | 0.425                     | 0.322-0.532 | 98.05              | <.001 |
| 2011-2015       | 0.426                     | 0.383-0.469 | 99.88              | <.001 |
| 2016-2020       | 0.371                     | 0.290-0.456 | 99.78              | <.001 |
| Lower-middle    |                           |             |                    |       |
| ≤2000           | 0.362                     | 0.306-0.420 | 78.77              | <.001 |
| 2011-2015       | 0.287                     | 0.175-0.414 | 95.45              | <.001 |
| 2016-2020       | 0.464                     | 0.369-0.560 | 98.08              | <.001 |

eAppendix 7. The list of the top 10 most common drugs used with PIM criteria

| Number | Drugs                                 |
|--------|---------------------------------------|
| 1      | Benzodiazepines                       |
| 2      | Non-steroidal anti-inflammatory drugs |
| 3      | Proton pump inhibitors                |
| 4      | Antidepressants                       |
| 5      | Antipsychotics                        |
| 6      | Anticholinergics                      |
| 7      | Antidiabetic medications              |
| 8      | Antihistaminic                        |
| 9      | Analgesics                            |
| 10     | Antithrombotic drugs                  |

eAppendix 8. Leave-one-out sensitivity analyses

|                                | proportion | 95%-CI           | p-value | tau <sup>2</sup> | I <sup>2</sup> |
|--------------------------------|------------|------------------|---------|------------------|----------------|
| Omitting Chang et al. 2018-1   | 0.3662     | [0.3331; 0.3999] | 0.0405  | 0.2012           | 100.00%        |
| Omitting Chang et al. 2018-2   | 0.3644     | [0.3316; 0.3977] | 0.0398  | 0.1994           | 100.00%        |
| Omitting Chen et al. 2021      | 0.3694     | [0.3367; 0.4027] | 0.0395  | 0.1987           | 100.00%        |
| Omitting Huang et al. 2020-1   | 0.3668     | [0.3337; 0.4005] | 0.0405  | 0.2013           | 100.00%        |
| Omitting Huang et al. 2020-2   | 0.3656     | [0.3326; 0.3993] | 0.0404  | 0.2009           | 100.00%        |
| Omitting Lin et al. 2011       | 0.3674     | [0.3343; 0.4011] | 0.0405  | 0.2011           | 100.00%        |
| Omitting Lu et al. 2022        | 0.3667     | [0.3336; 0.4005] | 0.0405  | 0.2013           | 100.00%        |
| Omitting Tian et al. 2021-1    | 0.3668     | [0.3337; 0.4006] | 0.0405  | 0.2013           | 100.00%        |
| Omitting Tian et al. 2021-2    | 0.3671     | [0.3340; 0.4009] | 0.0405  | 0.2013           | 100.00%        |
| Omitting Tian et al. 2022a-1   | 0.3668     | [0.3337; 0.4006] | 0.0405  | 0.2013           | 100.00%        |
| Omitting Tian et al. 2022a-2   | 0.367      | [0.3339; 0.4007] | 0.0405  | 0.2013           | 100.00%        |
| Omitting Tian et al. 2022a-3   | 0.3684     | [0.3355; 0.4020] | 0.0401  | 0.2002           | 100.00%        |
| Omitting Tian et al. 2022b     | 0.3671     | [0.3340; 0.4009] | 0.0405  | 0.2013           | 100.00%        |
| Omitting Weng et al. 2013      | 0.3665     | [0.3334; 0.4002] | 0.0405  | 0.2013           | 100.00%        |
| Omitting Zeng et al. 2020-1    | 0.3664     | [0.3333; 0.4002] | 0.0405  | 0.2013           | 100.00%        |
| Omitting Zeng et al. 2020-2    | 0.366      | [0.3330; 0.3997] | 0.0405  | 0.2012           | 100.00%        |
| Omitting Zeng et al. 2020-3    | 0.3649     | [0.3320; 0.3984] | 0.0401  | 0.2002           | 100.00%        |
| Omitting Zhang et al. 2021-1   | 0.3658     | [0.3328; 0.3995] | 0.0404  | 0.2011           | 100.00%        |
| Omitting Zhang et al. 2021-2   | 0.3657     | [0.3327; 0.3994] | 0.0404  | 0.201            | 100.00%        |
| Omitting Zhang et al. 2022-1   | 0.3668     | [0.3337; 0.4005] | 0.0405  | 0.2013           | 100.00%        |
| Omitting Zhang et al. 2022-2   | 0.3672     | [0.3341; 0.4009] | 0.0405  | 0.2012           | 100.00%        |
| Omitting Zhao et al. 2022      | 0.3665     | [0.3334; 0.4002] | 0.0405  | 0.2013           | 100.00%        |
| Omitting Anand et al. 2022     | 0.3645     | [0.3317; 0.3979] | 0.0399  | 0.1997           | 100.00%        |
| Omitting Bahat et al. 2019     | 0.3669     | [0.3338; 0.4006] | 0.0405  | 0.2013           | 100.00%        |
| Omitting Mugada et al. 2021    | 0.3679     | [0.3348; 0.4015] | 0.0403  | 0.2008           | 100.00%        |
| Omitting Shah et al. 2016      | 0.3672     | [0.3342; 0.4010] | 0.0405  | 0.2012           | 100.00%        |
| Omitting Sharma et al. 2021-1  | 0.3633     | [0.3310; 0.3964] | 0.039   | 0.1974           | 100.00%        |
| Omitting Sharma et al. 2021-2  | 0.3648     | [0.3319; 0.3983] | 0.04    | 0.2001           | 100.00%        |
| Omitting Zaveri et al. 2010    | 0.3677     | [0.3347; 0.4014] | 0.0404  | 0.2009           | 100.00%        |
| Omitting Patel et al. 2022     | 0.3673     | [0.3342; 0.4010] | 0.0405  | 0.2012           | 100.00%        |
| Omitting Arai et al. 2019      | 0.3665     | [0.3334; 0.4003] | 0.0405  | 0.2013           | 100.00%        |
| Omitting Bonfiglio et al. 2019 | 0.3669     | [0.3338; 0.4006] | 0.0405  | 0.2013           | 100.00%        |
| Omitting Fujie et al. 2020     | 0.3675     | [0.3344; 0.4012] | 0.0404  | 0.2011           | 100.00%        |
| Omitting Masumoto et al. 2017  | 0.367      | [0.3339; 0.4007] | 0.0405  | 0.2013           | 100.00%        |
| Omitting Suzuki et al. 2021-1  | 0.3675     | [0.3344; 0.4012] | 0.0404  | 0.2011           | 100.00%        |
| Omitting Suzuki et al. 2021-2  | 0.3661     | [0.3331; 0.3998] | 0.0405  | 0.2012           | 100.00%        |
| Omitting Uragami et al. 2021   | 0.366      | [0.3329; 0.3997] | 0.0405  | 0.2012           | 100.00%        |
| Omitting Bahat et al. 2017-1   | 0.3669     | [0.3338; 0.4007] | 0.0405  | 0.2013           | 100.00%        |
| Omitting Bahat et al. 2017-2   | 0.3665     | [0.3334; 0.4002] | 0.0405  | 0.2013           | 100.00%        |
| Omitting Kelleciet et al. 2022 | 0.366      | [0.3330; 0.3997] | 0.0405  | 0.2012           | 100.00%        |
| Omitting Paksoy et al. 2019    | 0.3684     | [0.3354; 0.4020] | 0.0401  | 0.2003           | 100.00%        |
| Omitting Pala et al. 2022      | 0.3646     | [0.3318; 0.3980] | 0.0399  | 0.1998           | 100.00%        |
| Omitting Sahin et al. 2021     | 0.3667     | [0.3336; 0.4005] | 0.0405  | 0.2013           | 100.00%        |

|                                       |        |                  |        |        |         |
|---------------------------------------|--------|------------------|--------|--------|---------|
| Omitting Sari et al. 2021-1           | 0.3665 | [0.3334; 0.4003] | 0.0405 | 0.2013 | 100.00% |
| Omitting Sari et al. 2021-2           | 0.366  | [0.3329; 0.3997] | 0.0405 | 0.2012 | 100.00% |
| Omitting Cho et al. 2019              | 0.3638 | [0.3312; 0.3970] | 0.0394 | 0.1984 | 100.00% |
| Omitting Kim et al. 2015-1            | 0.3667 | [0.3336; 0.4004] | 0.0405 | 0.2013 | 100.00% |
| Omitting Kim et al. 2015-2            | 0.3681 | [0.3351; 0.4018] | 0.0402 | 0.2006 | 100.00% |
| Omitting Kim et al. 2015-3            | 0.369  | [0.3361; 0.4024] | 0.0398 | 0.1994 | 100.00% |
| Omitting Kim et al. 2021              | 0.3707 | [0.3384; 0.4035] | 0.0382 | 0.1955 | 100.00% |
| Omitting Lim et al. 2016              | 0.3674 | [0.3343; 0.4011] | 0.0405 | 0.2012 | 100.00% |
| Omitting Yoon et al. 2022             | 0.3659 | [0.3328; 0.3996] | 0.0404 | 0.2011 | 100.00% |
| Omitting Al-Omar et al. 2013          | 0.3704 | [0.3380; 0.4033] | 0.0385 | 0.1963 | 100.00% |
| Omitting Alwhaibi et al. 2022         | 0.3652 | [0.3323; 0.3988] | 0.0402 | 0.2006 | 100.00% |
| Omitting Alhawassi et al. 2019        | 0.3652 | [0.3322; 0.3987] | 0.0402 | 0.2005 | 100.00% |
| Omitting Meraya et al. 2020           | 0.3642 | [0.3315; 0.3976] | 0.0397 | 0.1992 | 100.00% |
| Omitting Cojutti et al. 2016          | 0.3653 | [0.3323; 0.3989] | 0.0403 | 0.2006 | 100.00% |
| Omitting Galimberti et al. 2022-1     | 0.3662 | [0.3331; 0.3999] | 0.0405 | 0.2012 | 100.00% |
| Omitting Galimberti et al. 2022-2     | 0.3661 | [0.3331; 0.3999] | 0.0405 | 0.2012 | 100.00% |
| Omitting Galimberti et al. 2022-3     | 0.3664 | [0.3333; 0.4001] | 0.0405 | 0.2013 | 100.00% |
| Omitting Galimberti et al. 2022-4     | 0.3665 | [0.3334; 0.4002] | 0.0405 | 0.2013 | 100.00% |
| Omitting Galimberti et al. 2022-5     | 0.3666 | [0.3335; 0.4004] | 0.0405 | 0.2013 | 100.00% |
| Omitting Galimberti et al. 2022-6     | 0.3668 | [0.3337; 0.4005] | 0.0405 | 0.2013 | 100.00% |
| Omitting Galimberti et al. 2022-7     | 0.3669 | [0.3338; 0.4007] | 0.0405 | 0.2013 | 100.00% |
| Omitting Loddo et al. 2022-1          | 0.3638 | [0.3312; 0.3970] | 0.0394 | 0.1984 | 100.00% |
| Omitting Loddo et al. 2022-2          | 0.3636 | [0.3311; 0.3967] | 0.0392 | 0.1979 | 100.00% |
| Omitting Maio et al. 2006             | 0.3683 | [0.3353; 0.4019] | 0.0402 | 0.2004 | 100.00% |
| Omitting Maio et al. 2010             | 0.3675 | [0.3345; 0.4013] | 0.0404 | 0.2011 | 100.00% |
| Omitting Varga et al. 2017            | 0.3653 | [0.3324; 0.3990] | 0.0403 | 0.2007 | 100.00% |
| Omitting Bongue et al. 2009-1         | 0.3691 | [0.3363; 0.4025] | 0.0397 | 0.1992 | 100.00% |
| Omitting Bongue et al. 2009-2         | 0.3676 | [0.3345; 0.4013] | 0.0404 | 0.201  | 100.00% |
| Omitting Choukroun et al. 2020-1      | 0.368  | [0.3350; 0.4017] | 0.0403 | 0.2006 | 100.00% |
| Omitting Choukroun et al. 2020-2      | 0.3668 | [0.3337; 0.4005] | 0.0405 | 0.2013 | 100.00% |
| Omitting Drusch et al. 2021-1         | 0.3657 | [0.3326; 0.3993] | 0.0404 | 0.201  | 100.00% |
| Omitting Drusch et al. 2021-2         | 0.3659 | [0.3328; 0.3995] | 0.0404 | 0.2011 | 100.00% |
| Omitting Drusch et al. 2021-3         | 0.366  | [0.3330; 0.3997] | 0.0405 | 0.2012 | 100.00% |
| Omitting Drusch et al. 2021-4         | 0.3662 | [0.3331; 0.3999] | 0.0405 | 0.2013 | 100.00% |
| Omitting Drusch et al. 2021-5         | 0.3664 | [0.3334; 0.4002] | 0.0405 | 0.2013 | 100.00% |
| Omitting Dubois-Puechlong et al. 2019 | 0.3681 | [0.3350; 0.4017] | 0.0403 | 0.2006 | 100.00% |
| Omitting Dormann et al. 2013          | 0.3686 | [0.3356; 0.4021] | 0.04   | 0.2    | 100.00% |
| Omitting Endres et al. 2016           | 0.368  | [0.3350; 0.4017] | 0.0403 | 0.2007 | 100.00% |
| Omitting Fiss et al. 2011             | 0.3682 | [0.3352; 0.4019] | 0.0402 | 0.2005 | 100.00% |
| Omitting Gudd et al. 2020             | 0.3697 | [0.3371; 0.4029] | 0.0392 | 0.198  | 100.00% |
| Omitting Ham et al. 2022              | 0.366  | [0.3330; 0.3997] | 0.0405 | 0.2012 | 100.00% |
| Omitting Boersma et al. 2019          | 0.3617 | [0.3301; 0.3938] | 0.037  | 0.1924 | 100.00% |
| Omitting Oktora et al. 2021-1         | 0.3682 | [0.3352; 0.4018] | 0.0402 | 0.2005 | 100.00% |
| Omitting Oktora et al. 2021-2         | 0.3683 | [0.3353; 0.4019] | 0.0402 | 0.2004 | 100.00% |
| Omitting Oktora et al. 2021-3         | 0.3683 | [0.3353; 0.4019] | 0.0402 | 0.2004 | 100.00% |



|                                     |        |                  |        |        |         |
|-------------------------------------|--------|------------------|--------|--------|---------|
| Omitting Oktora et al. 2021-4       | 0.3683 | [0.3353; 0.4019] | 0.0401 | 0.2004 | 100.00% |
| Omitting Oktora et al. 2021-5       | 0.3684 | [0.3354; 0.4020] | 0.0401 | 0.2003 | 100.00% |
| Omitting van et al. 2021            | 0.3646 | [0.3318; 0.3981] | 0.0399 | 0.1998 | 100.00% |
| Omitting Santos-Pérez et al. 2021   | 0.3678 | [0.3347; 0.4015] | 0.0403 | 0.2009 | 100.00% |
| Omitting Yeste-Gómez et al. 2014    | 0.3653 | [0.3323; 0.3989] | 0.0403 | 0.2006 | 100.00% |
| Omitting Cvetković et al. 2019      | 0.3679 | [0.3349; 0.4016] | 0.0403 | 0.2008 | 100.00% |
| Omitting Projovic et al. 2016       | 0.3666 | [0.3335; 0.4003] | 0.0405 | 0.2013 | 100.00% |
| Omitting Buck et al. 2009-1         | 0.3678 | [0.3347; 0.4015] | 0.0404 | 0.2009 | 100.00% |
| Omitting Buck et al. 2009-2         | 0.3684 | [0.3354; 0.4020] | 0.0401 | 0.2003 | 100.00% |
| Omitting Curtis et al. 2004         | 0.3679 | [0.3349; 0.4016] | 0.0403 | 0.2008 | 100.00% |
| Omitting Dunn et al. 2011           | 0.3666 | [0.3335; 0.4003] | 0.0405 | 0.2013 | 100.00% |
| Omitting Gardner et al. 2020        | 0.3672 | [0.3341; 0.4009] | 0.0405 | 0.2012 | 100.00% |
| Omitting Hustey et al. 2007         | 0.3671 | [0.3340; 0.4008] | 0.0405 | 0.2013 | 100.00% |
| Omitting Lund et al. 2011           | 0.3661 | [0.3331; 0.3998] | 0.0405 | 0.2012 | 100.00% |
| Omitting Maggiore et al. 2014-1     | 0.3672 | [0.3341; 0.4010] | 0.0405 | 0.2012 | 100.00% |
| Omitting Maggiore et al. 2014-2     | 0.369  | [0.3362; 0.4024] | 0.0398 | 0.1994 | 100.00% |
| Omitting Maio et al. 2006           | 0.3676 | [0.3346; 0.4013] | 0.0404 | 0.201  | 100.00% |
| Omitting Nightingale et al. 2022    | 0.3664 | [0.3334; 0.4002] | 0.0405 | 0.2013 | 100.00% |
| Omitting Pugh et al. 2005           | 0.3681 | [0.3351; 0.4017] | 0.0402 | 0.2006 | 100.00% |
| Omitting Pyszka et al. 2010         | 0.3651 | [0.3322; 0.3987] | 0.0402 | 0.2004 | 100.00% |
| Omitting Skaar et al. 2017          | 0.365  | [0.3321; 0.3985] | 0.0401 | 0.2003 | 100.00% |
| Omitting Viswanathan et al. 2005    | 0.3687 | [0.3358; 0.4022] | 0.0399 | 0.1998 | 100.00% |
| Omitting Weston et al. 2010         | 0.368  | [0.3350; 0.4016] | 0.0403 | 0.2007 | 100.00% |
| Omitting Baldoni et al. 2014-1      | 0.3658 | [0.3328; 0.3995] | 0.0404 | 0.2011 | 100.00% |
| Omitting Baldoni et al. 2014-2      | 0.365  | [0.3321; 0.3985] | 0.0401 | 0.2003 | 100.00% |
| Omitting da Costa et al. 2019       | 0.3636 | [0.3311; 0.3967] | 0.0392 | 0.1979 | 100.00% |
| Omitting Faustino et al. 2013       | 0.3674 | [0.3344; 0.4012] | 0.0404 | 0.2011 | 100.00% |
| Omitting Fulone et al. 2017-1       | 0.3672 | [0.3341; 0.4009] | 0.0405 | 0.2012 | 100.00% |
| Omitting Fulone et al. 2017-2       | 0.3664 | [0.3334; 0.4002] | 0.0405 | 0.2013 | 100.00% |
| Omitting Marques et al. 2018        | 0.3677 | [0.3346; 0.4013] | 0.0404 | 0.2009 | 100.00% |
| Omitting Oliveira et al. 2020       | 0.3638 | [0.3313; 0.3970] | 0.0394 | 0.1985 | 100.00% |
| Omitting Reis et al. 2017           | 0.3658 | [0.3328; 0.3995] | 0.0404 | 0.201  | 100.00% |
| Omitting Viana et al. 2022          | 0.3664 | [0.3333; 0.4001] | 0.0405 | 0.2013 | 100.00% |
| Omitting abubakar et al. 2021-1     | 0.3644 | [0.3317; 0.3978] | 0.0398 | 0.1995 | 100.00% |
| Omitting abubakar et al. 2021-2     | 0.3664 | [0.3333; 0.4001] | 0.0405 | 0.2013 | 100.00% |
| Omitting Akande-Sholabi et al. 2018 | 0.3671 | [0.3340; 0.4008] | 0.0405 | 0.2013 | 100.00% |
| Omitting Fadare et al. 2013         | 0.3675 | [0.3345; 0.4013] | 0.0404 | 0.201  | 100.00% |
| Omitting Saka et al. 2019-1         | 0.3668 | [0.3337; 0.4005] | 0.0405 | 0.2013 | 100.00% |
| Omitting Bhagavathula et al. 2021   | 0.3659 | [0.3328; 0.3996] | 0.0404 | 0.2011 | 100.00% |
| Omitting Lemma et al. 2020          | 0.3659 | [0.3329; 0.3996] | 0.0404 | 0.2011 | 100.00% |
| Omitting Tesfaye et al. 2020-1      | 0.3631 | [0.3308; 0.3959] | 0.0387 | 0.1966 | 100.00% |
| Omitting Tesfaye et al. 2020-2      | 0.366  | [0.3330; 0.3997] | 0.0405 | 0.2012 | 100.00% |
| Omitting Cross et al. 2016          | 0.3679 | [0.3349; 0.4016] | 0.0403 | 0.2008 | 100.00% |
| Omitting Saarelainen et al. 2014    | 0.3675 | [0.3344; 0.4012] | 0.0404 | 0.2011 | 100.00% |
| Pooled estimate                     | 0.3667 | [0.3338; 0.4001] | 0.0402 | 0.2005 | 100.00% |

eAppendix 9. Funnel plot for the prevalence of PIMs

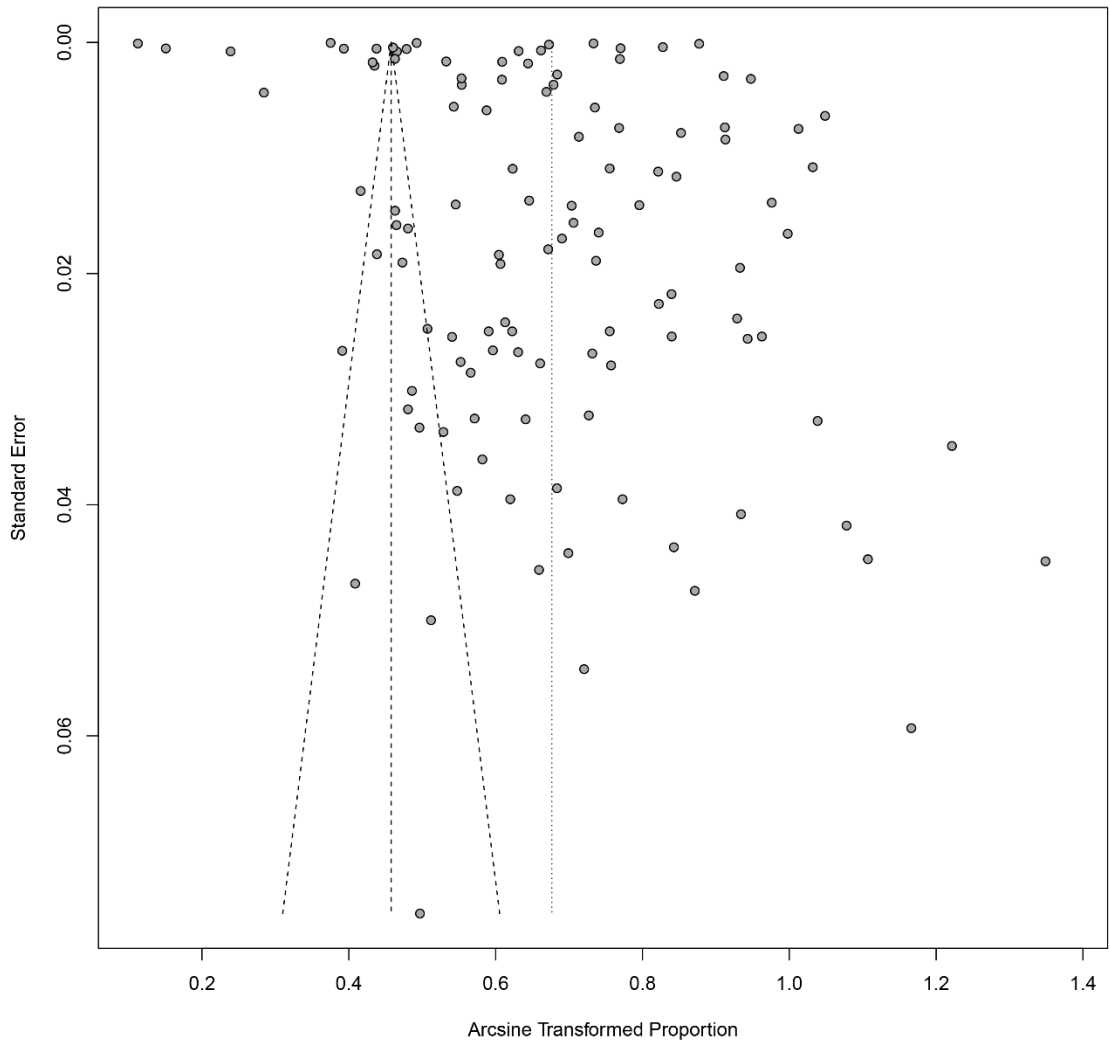

**Egger's test:**

```
> metabias(meta.data,method.bias="linreg")  
Linear regression test of funnel plot asymmetry  
  
Test result: t = 1.81, df = 130, p-value = 0.0732  
  
Sample estimates:  
      bias se.bias intercept se.intercept  
102.7158 56.8665    0.4436    0.0170
```

## eReferences

- [1] Chang CB, Lai HY, Hwang SJ, et al. The application of updating PIM-Taiwan criteria in clinic-visiting older patients with polypharmacy. *Ther Adv Drug Saf.* 2018 Oct 15;9(12):699-709. doi: 10.1177/2042098618804493.
- [2] Chen Q, Zhang L. Analysis of potentially inappropriate medications (PIM) used in elderly outpatients in departments of internal medicine by using the Screening Tool of Older Persons' Potentially Inappropriate Prescriptions (STOPP) criteria. *Ann Palliat Med.* 2021 Apr;10(4):4678-4686. doi: 10.21037/apm-21-799.
- [3] Huang Y, Zhang L, Huang X, et al. Potentially inappropriate medications in Chinese community-dwelling older adults. *Int J Clin Pharm.* 2020 Apr;42(2):598-603. doi: 10.1007/s11096-020-00980-y.
- [4] Lin YJ, Peng LN, Chen LK, et al. Risk factors of potentially inappropriate medications among older patients visiting the community health center in rural Taiwan. *Arch Gerontol Geriatr.* 2011 Sep-Oct;53(2):225-8. doi: 10.1016/j.archger.2010.11.017.
- [5] Lu L, Yao K, Chen J, Yang Y, et al. Prevalence of potentially inappropriate medications and association with comorbidities in older adults with diabetes in an outpatient visitation setting. *Front Public Health.* 2022 Sep 20;10:995948. doi: 10.3389/fpubh.2022.995948.
- [6] Tian F, Li H, Chen Z, et al. Potentially inappropriate medications in Chinese older outpatients in tertiary hospitals according to Beers criteria: A cross-sectional study. *Int J Clin Pract.* 2021 Aug;75(8):e14348. doi: 10.1111/ijcp.14348.
- [7] Tian F, Zhao M, Chen Z, et al. Prescription of Potentially Inappropriate Medication Use in Older Cancer Outpatients With Multimorbidity: Concordance Among the Chinese, AGS/Beers, and STOPP Criteria. *Front Pharmacol.* 2022 Apr 12;13:857811. doi: 10.3389/fphar.2022.857811.
- [8] Tian F, Chen Z, Tang R, et al. Impact of the expert consensus on polypharmacy and potentially inappropriate medication use in elderly lung cancer outpatients with multimorbidity: An interrupted time series analysis, 2016-2021. *Front Pharmacol.* 2022 Oct 5;13:992394. doi: 10.3389/fphar.2022.992394.
- [9] Weng MC, Tsai CF, Sheu KL, et al. The impact of number of drugs prescribed on the risk of potentially inappropriate medication among outpatient older adults with chronic diseases. *QJM.* 2013 Nov;106(11):1009-15. doi: 10.1093/qjmed/hct141.
- [10] Zeng Y, Yu Y, Liu Q, et al. Comparison of the prevalence and nature of potentially inappropriate medication use in geriatric outpatients between tertiary and community healthcare settings: a multicenter cross-sectional study. *Int J Clin Pharm.* 2022 Jun;44(3):619-629. doi: 10.1007/s11096-022-01380-0.
- [11] Zhang H, Wong ELY, Wong SYS, et al. Comparison of adaptive versions of the Hong Kong-specific criteria and 2015 Beers criteria for assessing potentially inappropriate medication use in Hong Kong older patients. *BMC Geriatr.* 2021 Jun 21;21(1):379. doi: 10.1186/s12877-021-02324-5.
- [12] Zhang Y, Chen Z, Tian F. Potentially inappropriate medications in older Chinese outpatients based on the Beers criteria and Chinese criteria. *Front Pharmacol.* 2022 Sep 30;13:991087. doi: 10.3389/fphar.2022.991087.
- [13] Zhao M, Chen Z, Tian F, et al. Potentially Inappropriate Medication Among People With Dementia in China: A Nationwide Cross-Sectional Study. *Front Pharmacol.* 2022 Jun 13;13:929584. doi: 10.3389/fphar.2022.929584.
- [14] Anand P, Katyal J, Dey AB, et al. Characterization of potentially inappropriate medications use in Indian elderly population and their impact on quality of life using Beers criteria. *Aging Med (Milton).* 2022 Feb 5;5(1):45-52. doi: 10.1002/agm2.12194.
- [15] Bhatt AN, Paul SS, Krishnamoorthy S, et al, Mathew A, Nair BR. Potentially inappropriate medications prescribed for older persons: A study from two teaching hospitals in Southern India. *J Family Community Med.* 2019 Sep-Dec;26(3):187-192. doi: 10.4103/jfcm.JFCM\_81\_19.
- [16] Mugada V, Bhagavathi KC, Sagina P, et al. Potentially inappropriate medications, drug-drug interactions, and prescribing practices in elderly patients: a cross-sectional study. *Rev Assoc Med Bras (1992).* 2021 Jun;67(6):800-805. doi: 10.1590/1806-9282.20200912.

- [17] Shah KN, Joshi HM, Christian RP, et al. Prevalence of potentially inappropriate medications and prescription cost analysis among older cardiac patients in an outpatient department of a tertiary care hospital in India. *J Basic Clin Pharm*. 2016 Sep;7(4):110-115. doi: 10.4103/0976-0105.189434.
- [18] Sharma R, Bansal P, Sharma A, et al. Prevalence and predictors of Potentially Inappropriate Psychotropic Medication in older adults with psychiatric illness. *Asian J Psychiatr*. 2021 Dec;66:102872. doi: 10.1016/j.ajp.2021.102872.
- [19] Zaveri HG, Mansuri SM, Patel VJ. Use of potentially inappropriate medicines in elderly: A prospective study in medicine out-patient department of a tertiary care teaching hospital. *Indian J Pharmacol*. 2010 Apr;42(2):95-8. doi: 10.4103/0253-7613.64499.
- [20] Patel MM, Mark AS, Shah NA. Assessment of appropriateness of prescribing among Indian geriatric outpatients using STOPP and START Criteria Version 2 at a tertiary care teaching hospital. *Natl J Physiol Pharm Pharmacol*. 2022 May; 12(10): 1746-1750. doi:10.5455/njppp.2023.13.05208202221052022
- [21] Arai S, Ishikawa T, Kato H, et al. Multidrug use positively correlates with high-risk prescriptions in the Japanese elderly: a longitudinal study. *J Pharm Health Care Sci*. 2019 Sep 2;5:20. doi: 10.1186/s40780-019-0150-6.
- [22] Bonfiglio V, Umegaki H, Kuzuya M. Potentially Inappropriate Medications and Polypharmacy: A Study of Older People with Mild Cognitive Impairment and Mild Dementia. *J Alzheimers Dis*. 2019;71(3):889-897. doi: 10.3233/JAD-190284.
- [23] Fujie K, Kamei R, Araki R, et al. Prescription of potentially inappropriate medications in elderly outpatients: a survey using 2015 Japanese Guidelines. *Int J Clin Pharm*. 2020 Apr;42(2):579-587. doi: 10.1007/s11096-020-00967-9. Epub 2020 Jan 21.
- [24] Masumoto S, Sato M, Maeno T, et al. Association between potentially inappropriate medications and anxiety in Japanese older patients. *Geriatr Gerontol Int*. 2017 Dec;17(12):2520-2526. doi: 10.1111/ggi.13128.
- [25] Suzuki Y, Shiraiishi N, Komiya H, et al. Potentially inappropriate medications increase while prevalence of polypharmacy/hyperpolypharmacy decreases in Japan: A comparison of nationwide prescribing data. *Arch Gerontol Geriatr*. 2022 Sep-Oct;102:104733. doi: 10.1016/j.archger.2022.104733.
- [26] Uragami Y, Takikawa K, Kareki H, et al. Effect of number of medications and use of potentially inappropriate medications on frailty among early-stage older outpatients. *J Pharm Health Care Sci*. 2021 May 3;7(1):15. doi: 10.1186/s40780-021-00195-x.
- [27] Bahat G, Bay I, Tufan A, et al. Prevalence of potentially inappropriate prescribing among older adults: A comparison of the Beers 2012 and Screening Tool of Older Person's Prescriptions criteria version 2. *Geriatr Gerontol Int*. 2017 Sep;17(9):1245-1251. doi: 10.1111/ggi.12850.
- [28] Kelleci Çakır B, Kızıllaranoğlu MC, Kılıç MK, et al. Assessment of the Appropriateness of Prescriptions in a Geriatric Outpatient Clinic. *Turk J Pharm Sci*. 2022 Feb 28;19(1):54-62. doi: 10.4274/tjps.galenos.2021.77010.
- [29] Paksoy C, Özkan Ö, Ustaalioğlu BB, et al. Evaluation of potentially inappropriate medication utilization in elderly patients with cancer at outpatient oncology unit. *J Oncol Pharm Pract*. 2019 Sep;25(6):1321-1327. doi: 10.1177/1078155218788698.
- [30] Pala E, Ersoy S, Engin VS, et al. Effectiveness of STOPP/START criteria in primary prevention of polypharmacy and under-treatment in older patients. *Therapie*. 2022 May-Jun;77(3):361-369. doi: 10.1016/j.therap.2021.07.003.
- [31] ŞAHİN E K, HAMURCU H D, ÇAYKÖYLÜ A, et al. Evaluation of the potentially inappropriate psychotropic use in elderly psychiatric patients[J]. *Turkish Journal of Geriatrics/Türk Geriatri Dergisi*; 2021 Sep; 24(4).
- [32] Sari YE, Unluoglu I, Cavusoglu Y, et al. Inappropriate drug use rates of geriatric patients attending to a university hospital cardiology policlinic. *Niger J Clin Pract*. 2021 Nov;24(11):1719-1727. doi: 10.4103/njcp.njcp\_517\_18.
- [33] Cho ST, Kim JS, Noh J, et al. Characteristics of inappropriate multiple medication use in older urological outpatients. *Arch Gerontol Geriatr*. 2019 Jul-Aug;83:61-65. doi:

- 10.1016/j.archger.2019.03.024.
- [34] Kim DS, Huh S, Lee S. Potentially inappropriate medication use at ambulatory care visits by elderly patients covered by National Health Insurance in Korea. *Int J Clin Pharmacol Ther.* 2015 Oct;53(10):819-27. doi: 10.5414/CP202429.
- [35] Kim J, Han E, Hwang HJ, et al. Potentially inappropriate prescribing of cardiovascular system and antiplatelet/anticoagulant drugs among elderly patients: a Korean population-based national study. *J Geriatr Cardiol.* 2021 May 28;18(5):327-337. doi: 10.11909/j.issn.1671-5411.2021.05.010.
- [36] Lim YJ, Kim HY, Choi J, et al. Potentially Inappropriate Medications by Beers Criteria in Older Outpatients: Prevalence and Risk Factors. *Korean J Fam Med.* 2016 Nov;37(6):329-333. doi: 10.4082/kjfm.2016.37.6.329. Epub 2016 Nov 18.
- [37] Yoon K, Kim JT, Kwack WG, et al. Potentially Inappropriate Medication Use in Patients with Dementia. *Int J Environ Res Public Health.* 2022 Sep 10;19(18):11426. doi: 10.3390/ijerph191811426.
- [38] Al-Omar HA, Al-Sultan MS, Abu-Auda HS. Prescribing of potentially inappropriate medications among the elderly population in an ambulatory care setting in a Saudi military hospital: trend and cost. *Geriatr Gerontol Int.* 2013 Jul;13(3):616-21. doi: 10.1111/j.1447-0594.2012.00951.x.
- [39] Alwhaibi M. Potentially Inappropriate Medications Use among Older Adults with Comorbid Diabetes and Hypertension in an Ambulatory Care Setting. *J Diabetes Res.* 2022 May 9;2022:1591511. doi: 10.1155/2022/1591511.
- [40] Alhawassi TM, Alatawi W, Alwhaibi M. Prevalence of potentially inappropriate medications use among older adults and risk factors using the 2015 American Geriatrics Society Beers criteria. *BMC Geriatr.* 2019 May 29;19(1):154. doi: 10.1186/s12877-019-1168-1.
- [41] Meraya AM, Banji OJF, Khobrani MA, et al. Evaluation of psychotropic medications use among elderly with psychiatric disorders in Saudi Arabia. *Saudi Pharm J.* 2021 Jun;29(6):603-608. doi: 10.1016/j.jsps.2021.04.021.
- [42] Cojutti P, Arnoldo L, Cattani G, et al. Polytherapy and the risk of potentially inappropriate prescriptions (PIPs) among elderly and very elderly patients in three different settings (hospital, community, long-term care facilities) of the Friuli Venezia Giulia region, Italy: are the very elderly at higher risk of PIPs? *Pharmacoepidemiol Drug Saf.* 2016 Sep;25(9):1070-8. doi: 10.1002/pds.4026.
- [43] Galimberti F, Casula M, Scotti L, et al. Potentially Inappropriate Prescribing among Elderly Outpatients: Evaluation of Temporal Trends 2012-2018 in Piedmont, Italy. *Int J Environ Res Public Health.* 2022 Mar 18;19(6):3612. doi: 10.3390/ijerph19063612.
- [44] Loddo S, Salis F, Rundeddu S, et al. Nutritional Status and Potentially Inappropriate Medications in Elderly. *J Clin Med.* 2022 Jun 16;11(12):3465. doi: 10.3390/jcm11123465.
- [45] Maio V, Yuen EJ, Novielli K, et al. Potentially inappropriate medication prescribing for elderly outpatients in Emilia Romagna, Italy: a population-based cohort study. *Drugs Aging.* 2006;23(11):915-24. doi: 10.2165/00002512-200623110-00006.
- [46] Maio V, Del Canale S, Abouzaid S; GAP Investigators. Using explicit criteria to evaluate the quality of prescribing in elderly Italian outpatients: a cohort study. *J Clin Pharm Ther.* 2010 Apr;35(2):219-29. doi: 10.1111/j.1365-2710.2009.01094.x.
- [47] Varga S, Alcusky M, Keith SW, Hegarty SE, Del Canale S, Lombardi M, Maio V. Hospitalization rates during potentially inappropriate medication use in a large population-based cohort of older adults. *Br J Clin Pharmacol.* 2017 Nov;83(11):2572-2580. doi: 10.1111/bcp.13365.
- [48] Bongue B, Naudin F, Laroche ML, et al. Trends of the potentially inappropriate medication consumption over 10 years in older adults in the East of France. *Pharmacoepidemiol Drug Saf.* 2009 Dec;18(12):1125-33. doi: 10.1002/pds.1762.
- [49] Choukroun C, Leguelinel-Blache G, Roux-Marson C, et al. Impact of a pharmacist and geriatrician medication review on drug-related problems in older outpatients with cancer. *J Geriatr Oncol.* 2021 Jan;12(1):57-63. doi: 10.1016/j.jgo.2020.07.010.
- [50] Drusch S, Le Tri T, Ankri J, et al. Decreasing trends in potentially inappropriate medications in older people: a nationwide repeated cross-sectional study. *BMC Geriatr.* 2021 Nov 2;21(1):621. doi: 10.1186/s12877-021-02568-1.

- [51] Dubois-Puechlong S, Mille F, Hindlet P, et al. Potentially inappropriate prescriptions of antithrombotic therapies in older outpatients: a French multicenter cross-sectional study. *Eur Geriatr Med.* 2019 Jun;10(3):473-481. doi: 10.1007/s41999-019-00176-2.
- [52] Dormann H, Sonst A, Müller F, et al. Adverse drug events in older patients admitted as an emergency: the role of potentially inappropriate medication in elderly people (PRISCUS). *Dtsch Arztebl Int.* 2013 Mar;110(13):213-9. doi: 10.3238/arztebl.2013.0213.
- [53] Endres HG, Kaufmann-Kolle P, Steeb V, et al. Association between Potentially Inappropriate Medication (PIM) Use and Risk of Hospitalization in Older Adults: An Observational Study Based on Routine Data Comparing PIM Use with Use of PIM Alternatives. *PLoS One.* 2016 Feb 3;11(2):e0146811. doi: 10.1371/journal.pone.0146811.
- [54] Fiss T, Dreier A, Meinke C, et al. Frequency of inappropriate drugs in primary care: analysis of a sample of immobile patients who received periodic home visits. *Age Ageing.* 2011 Jan;40(1):66-73. doi: 10.1093/ageing/afq106.
- [55] Gudd K, Meier F, Lindenthal J, et al. Potenziell inadäquate Medikation in einem deutschen Praxisnetz – Wer verordnet was an wen? [Potentially inappropriate medication in a German practice network-who prescribes what to whom?]. *Z Gerontol Geriatr.* 2020 Nov;53(7):647-654. German. doi: 10.1007/s00391-019-01660-x.
- [56] Ham L, Geijteman ECT, Aarts MJ, et al. Use of potentially inappropriate medication in older patients with lung cancer at the end of life. *J Geriatr Oncol.* 2022 Jan;13(1):53-59. doi: 10.1016/j.jgo.2021.07.009.
- [57] Boersma MN, Huibers CJA, Drenth-van Maanen AC, et al. The effect of providing prescribing recommendations on appropriate prescribing: A cluster-randomized controlled trial in older adults in a preoperative setting. *Br J Clin Pharmacol.* 2019 Sep;85(9):1974-1983. doi: 10.1111/bcp.13987.
- [58] Oktora MP, Alfian SD, Bos HJ, et al. Trends in polypharmacy and potentially inappropriate medication (PIM) in older and middle-aged people treated for diabetes. *Br J Clin Pharmacol.* 2021 Jul;87(7):2807-2817. doi: 10.1111/bcp.14685.
- [59] van Loveren FMAM, van Berlo-van de Laar IRF, Imholz ALT, et al. Prevalence and follow-up of potentially inappropriate medication and potentially omitted medication in older patients with cancer - The PIM POM study. *J Geriatr Oncol.* 2021 Jan;12(1):80-84. doi: 10.1016/j.jgo.2020.06.014.
- [60] Santos-Pérez MI, Fierro I, Salgueiro-Vázquez ME, et al. A cross-sectional study of psychotropic drug use in the elderly: Consuming patterns, risk factors and potentially inappropriate use. *Eur J Hosp Pharm.* 2021 Mar;28(2):88-93. doi: 10.1136/ejpharm-2019-001927.
- [61] Yeste-Gómez I, Durán-García ME, Muiño-Míguez A, et al. Prescripciones potencialmente inapropiadas en el tratamiento ambulatorio de pacientes ancianos [Potentially inappropriate prescriptions in the ambulatory treatment of elderly patients]. *Rev Calid Asist.* 2014 Jan-Feb;29(1):22-8. Spanish. doi: 10.1016/j.cali.2013.08.001.
- [62] Cvetković Z, Perić A, Dobrić S. Potentially Inappropriate Prescribing and Potential Clinically Significant Drug-Drug Interactions in Older Outpatients: Is There Any Association? *Medicina (Kaunas).* 2019 Jul 3;55(7):332. doi: 10.3390/medicina55070332.
- [63] Projovic I, Vukadinovic D, Milovanovic O, et al. Risk factors for potentially inappropriate prescribing to older patients in primary care. *Eur J Clin Pharmacol.* 2016 Jan;72(1):93-107. doi: 10.1007/s00228-015-1957-1.
- [64] Buck MD, Atreja A, Brunker CP, et al. Potentially inappropriate medication prescribing in outpatient practices: prevalence and patient characteristics based on electronic health records. *Am J Geriatr Pharmacother.* 2009 Apr;7(2):84-92. doi: 10.1016/j.amjopharm.2009.03.001.
- [65] Curtis LH, Østbye T, Sendersky V, et al. Inappropriate prescribing for elderly Americans in a large outpatient population. *Arch Intern Med.* 2004 Aug 9-23;164(15):1621-5. doi: 10.1001/archinte.164.15.1621.
- [66] Dunn RL, Harrison D, Ripley TL. The beers criteria as an outpatient screening tool for potentially inappropriate medications. *Consult Pharm.* 2011 Oct;26(10):754-63. doi: 10.4140/TCP.n.2011.754.
- [67] Gardner K, Schwarz K, Pearson S, et al. Potentially Inappropriate Medication Usage in Older Adults in a Tertiary Academic Medical Center Emergency Department. *J Pharm Pract.* 2022

- Dec;35(6):892-897. doi: 10.1177/08971900211016813.
- [68] Hustey FM, Wallis N, Miller J. Inappropriate prescribing in an older ED population. *Am J Emerg Med.* 2007 Sep;25(7):804-7. doi: 10.1016/j.ajem.2007.01.018.
- [69] Lund BC, Steinman MA, Chrischilles EA, et al. Beers criteria as a proxy for inappropriate prescribing of other medications among older adults. *Ann Pharmacother.* 2011 Nov;45(11):1363-70. doi: 10.1345/aph.1Q361.
- [70] Maggiore RJ, Dale W, Gross CP, et al. Polypharmacy and potentially inappropriate medication use in older adults with cancer undergoing chemotherapy: effect on chemotherapy-related toxicity and hospitalization during treatment. *J Am Geriatr Soc.* 2014 Aug;62(8):1505-12. doi: 10.1111/jgs.12942.
- [71] Maio V, Hartmann CW, Poston S, et al. Potentially inappropriate prescribing for elderly patients in 2 outpatient settings. *Am J Med Qual.* 2006 May-Jun;21(3):162-8. doi: 10.1177/1062860605285475.
- [72] Nightingale G, Scopelliti EM, Casten R, et al. Polypharmacy and Potentially Inappropriate Medication Use in Older Blacks with Diabetes Mellitus Presenting to the Emergency Department. *J Aging Health.* 2022 Aug-Sep;34(4-5):499-507. doi: 10.1177/08982643211045546. Epub 2021 Sep 13.
- [73] Pugh MJ, Fincke BG, Bierman AS, et al. Potentially inappropriate prescribing in elderly veterans: are we using the wrong drug, wrong dose, or wrong duration? *J Am Geriatr Soc.* 2005 Aug;53(8):1282-9. doi: 10.1111/j.1532-5415.2005.53402.x.
- [74] Pyszka LL, Seys Ranola TM, Milhans SM. Identification of inappropriate prescribing in geriatrics at a Veterans Affairs hospital using STOPP/START screening tools. *Consult Pharm.* 2010 Jun;25(6):365-73. doi: 10.4140/TCP.n.2010.365.
- [75] Skaar DD, O'Connor H. Using the Beers criteria to identify potentially inappropriate medication use by older adult dental patients. *J Am Dent Assoc.* 2017 May;148(5):298-307. doi: 10.1016/j.adaj.2017.01.020.
- [76] Viswanathan H, Bharmal M, Thomas J 3rd. Prevalence and correlates of potentially inappropriate prescribing among ambulatory older patients in the year 2001: comparison of three explicit criteria. *Clin Ther.* 2005 Jan;27(1):88-99. doi: 10.1016/j.clinthera.2005.01.009.
- [77] Weston AL, Weinstein AM, Barton C, et al. Potentially inappropriate medication use in older adults with mild cognitive impairment. *J Gerontol A Biol Sci Med Sci.* 2010 Mar;65(3):318-21. doi: 10.1093/gerona/glp158.
- [78] Baldoni Ade O, Ayres LR, Martinez EZ, et al. Factors associated with potentially inappropriate medications use by the elderly according to Beers criteria 2003 and 2012. *Int J Clin Pharm.* 2014 Apr;36(2):316-24. doi: 10.1007/s11096-013-9880-y.
- [79] da Costa IHF, Silva RME, Carlos JO, et al. Potentially inappropriate medications in older kidney transplant recipients: a Brazilian prevalence study. *Int J Clin Pharm.* 2019 Aug;41(4):888-894. doi: 10.1007/s11096-019-00842-2.
- [80] Faustino CG, Passarelli MC, Jacob-Filho W. Potentially inappropriate medications among elderly Brazilian outpatients. *Sao Paulo Med J.* 2013;131(1):19-26. doi: 10.1590/s1516-31802013000100004.
- [81] Fulone I, Lopes LC. Potentially inappropriate prescriptions for elderly people taking antidepressant: comparative tools. *BMC Geriatr.* 2017 Dec 2;17(1):278. doi: 10.1186/s12877-017-0674-2.
- [82] Marques GFM, Rezende DMRP, Silva IPD, et al. Polypharmacy and potentially inappropriate medications for elder people in gerontological nursing. *Rev Bras Enferm.* 2018 Sep-Oct;71(5):2440-2446. English, Portuguese. doi: 10.1590/0034-7167-2017-0211.
- [83] Oliveira HSB, Michels AC, Nahime M, et al. Risk factors associated with potential cardiovascular and cerebrovascular adverse events in elderly individuals assisted at secondary level. *Rev Assoc Med Bras (1992).* 2020 Aug;66(8):1087-1092. doi: 10.1590/1806-9282.66.8.1087.
- [84] Reis CM, Dos Santos AG, de Jesus Souza P, et al. Factors associated with the use of potentially inappropriate medications by older adults with cancer. *J Geriatr Oncol.* 2017 Jul;8(4):303-307. doi: 10.1016/j.jgo.2017.05.003.

- [85] Viana SSC, Souza NPDS, Aliberti MJR, et al. Use of potentially inappropriate medications and adverse events in older outpatients with acute conditions. *Einstein (Sao Paulo)*. 2022 Jul 4;20:eAO8024. doi: 10.31744/einstein\_journal/2022AO8024.
- [86] Abubakar U, Tangiisuran B, Kolo M, et al. Prevalence and predictors of potentially inappropriate medication use among ambulatory older adults in Northern Nigeria[J]. *Drugs & Therapy Perspectives*, 2021, 37: 94-99.
- [87] Akande-Sholabi W, Adebusoye LA, Olowookere OO. Potentially inappropriate medication use among older patients attending a geriatric centre in south-west Nigeria. *Pharm Pract (Granada)*. 2018 Jul-Sep;16(3):1235. doi: 10.18549/PharmPract.2018.03.1235.
- [88] Fadare JO, Agboola SM, Opeke OA, et al. Prescription pattern and prevalence of potentially inappropriate medications among elderly patients in a Nigerian rural tertiary hospital. *Ther Clin Risk Manag*. 2013;9:115-20. doi: 10.2147/TCRM.S40120.
- [89] Saka SA, Oosthuizen F, Nlotoo M. Potential inappropriate prescribing and associated factors among older persons in Nigeria and South Africa. *Int J Clin Pharm*. 2019 Feb;41(1):207-214. doi: 10.1007/s11096-018-0770-1.
- [90] Bhagavathula AS, Seid MA, Adane A, et al. Prevalence and Determinants of Multimorbidity, Polypharmacy, and Potentially Inappropriate Medication Use in the Older Outpatients: Findings from EuroAgeism H2020 ESR7 Project in Ethiopia. *Pharmaceuticals (Basel)*. 2021 Aug 25;14(9):844. doi: 10.3390/ph14090844.
- [91] Lemma W, Islam M, Loha E. Potentially inappropriate medication prescribing patterns in geriatric patients in a health facility in Addis Ababa, Ethiopia[J]. *Tropical Journal of Pharmaceutical Research*, 2020, 19(11): 2441-2446.
- [92] Tesfaye BT, Tessema MT, Yizengaw MA, et al. Potentially inappropriate medication use among older adult patients on follow-up at the chronic care clinic of a specialized teaching hospital in Ethiopia. A cross-sectional study. *BMC Geriatr*. 2021 Oct 7;21(1):530. doi: 10.1186/s12877-021-02463-9.
- [93] Cross AJ, George J, Woodward MC, et al. Potentially Inappropriate Medications and Anticholinergic Burden in Older People Attending Memory Clinics in Australia. *Drugs Aging*. 2016 Jan;33(1):37-44. doi: 10.1007/s40266-015-0332-3.
- [94] Saarelainen LK, Turner JP, Shakib S, et al. Potentially inappropriate medication use in older people with cancer: prevalence and correlates. *J Geriatr Oncol*. 2014 Oct 1;5(4):439-46. doi: 10.1016/j.jgo.2014.07.001.
