# Supplementary material for: Prevalence of Use of Potentially Inappropriate Medications Among Older Adults Worldwide: A Systematic Review and Meta-Analysis
Source: PubMed Central journal article supplement (PMC10398411; doi:10.1001/jamanetworkopen.2023.26910), 2023-08-02
Supplement: jamanetwopen-e2326910-s002.pdf [file jamanetwopen-e2326910-s002.pdf]

## Data Sharing Statement

Tian. Prevalence of Use of Potentially Inappropriate Medications Among Older Adults Worldwide. *JAMA Netw Open*. Published August 02, 2023.  
doi:10.1001/jamanetworkopen.2023.26910

### Data

**Data available:** No
